# Supplementary material for: Design, synthesis and antimicrobial assessments of aminoacetylenic-piperazine nitroimidazole hybrid compounds
Source: publisher site journal article supplement (doi:10.1515/znc-2022-0043), 2022-08-09

# Supporting Information

## **Design, synthesis and antimicrobial assessments of Aminoacetylenic-piperazine Nitroimidazol Hybrid Compounds**

**Anas J. Rasras, Raed A. Al-Qawasmeh, Mohammed Alnaggar, Ihsan Shehadi, Mahmoud M. Elaasser, Yaseen A. Al-Soud**

**$^1\text{H}$  NMR,  $^{13}\text{C}$  NMR and DEPT 135 Spectra**

# Compound 6

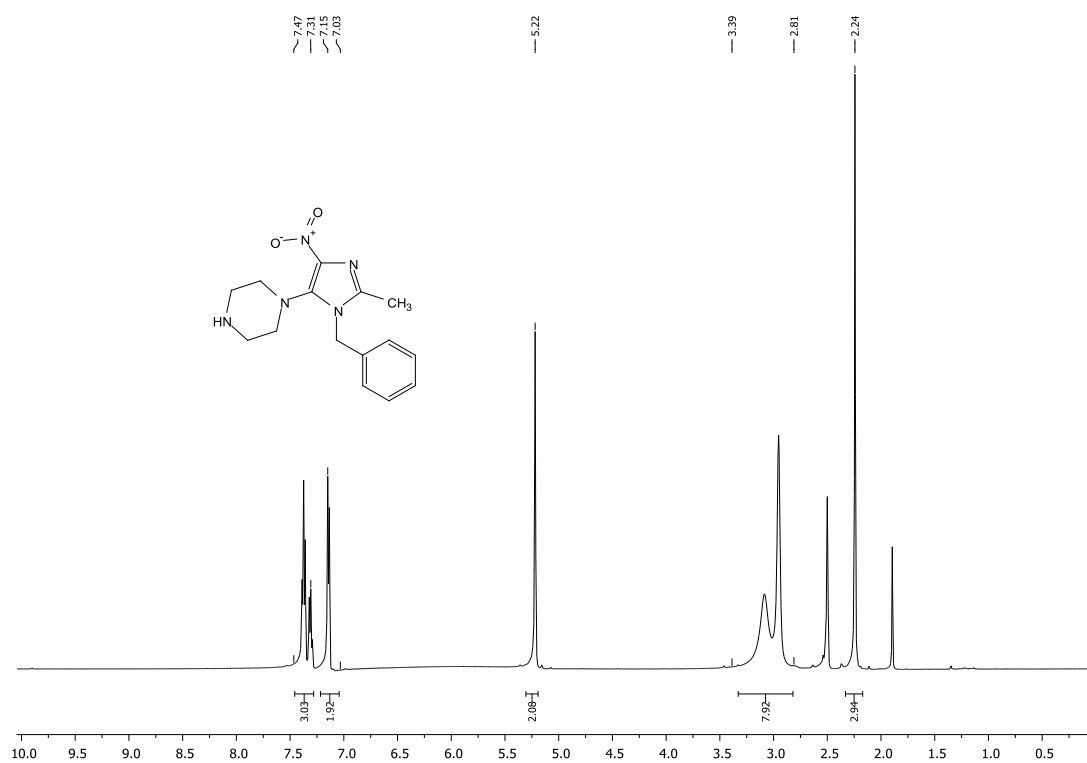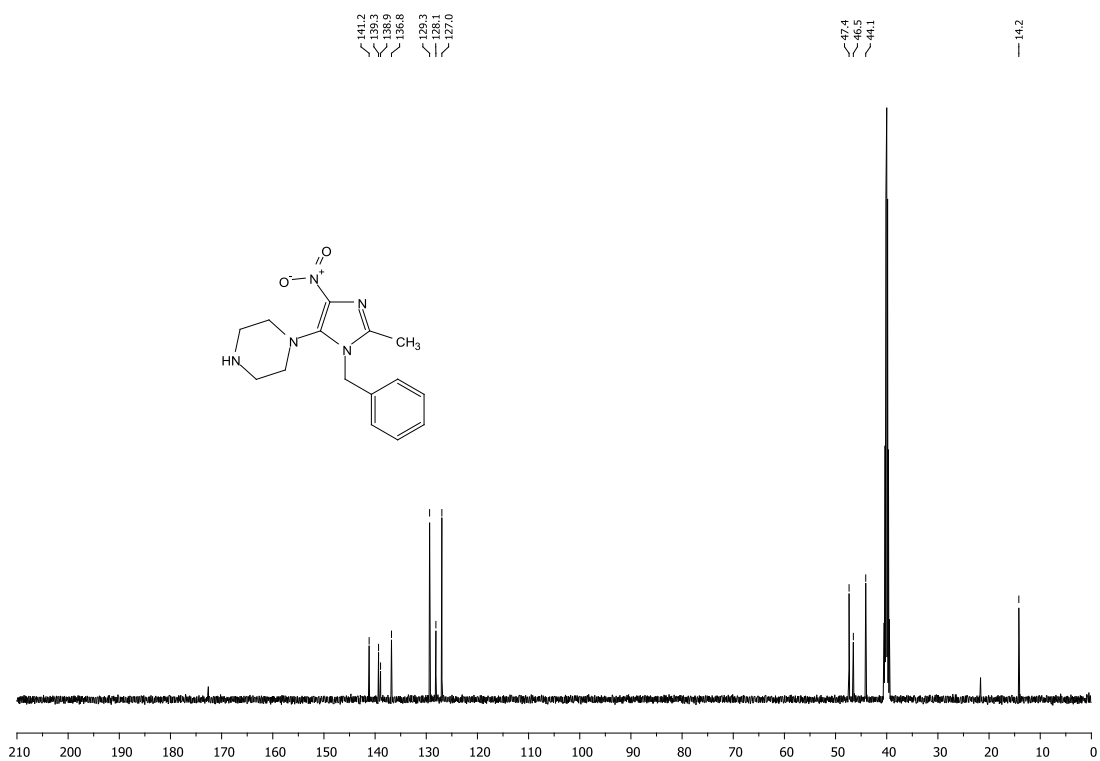

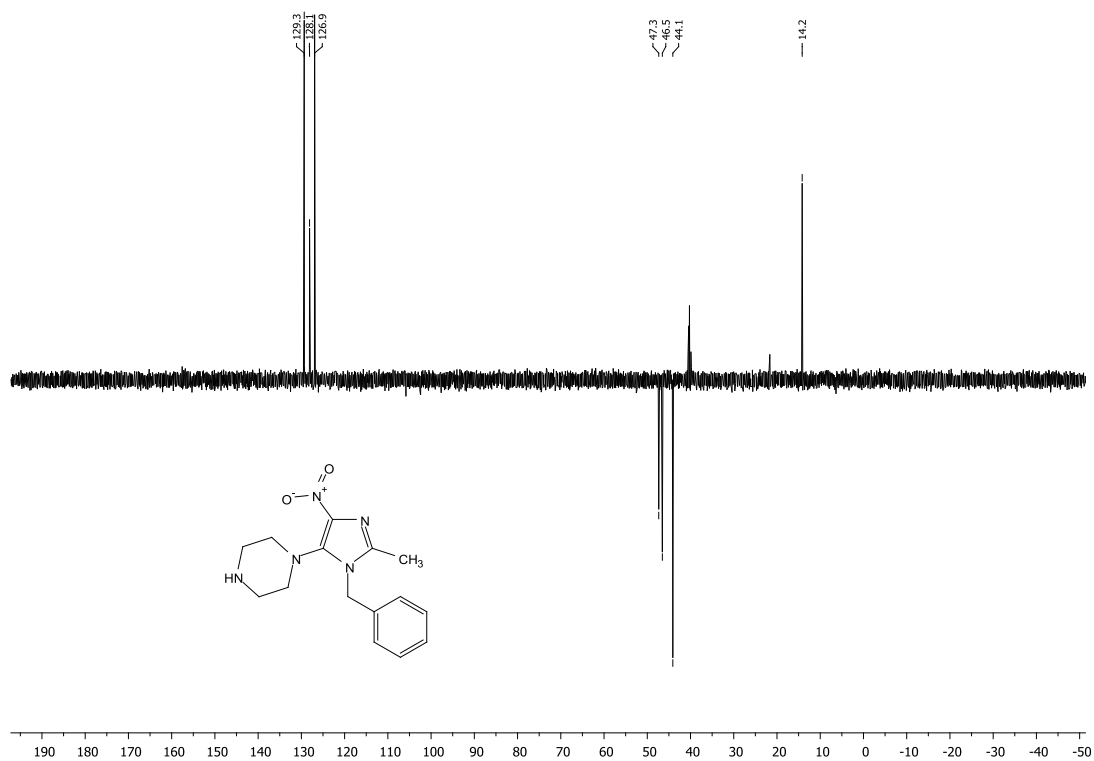

# Compound 10a

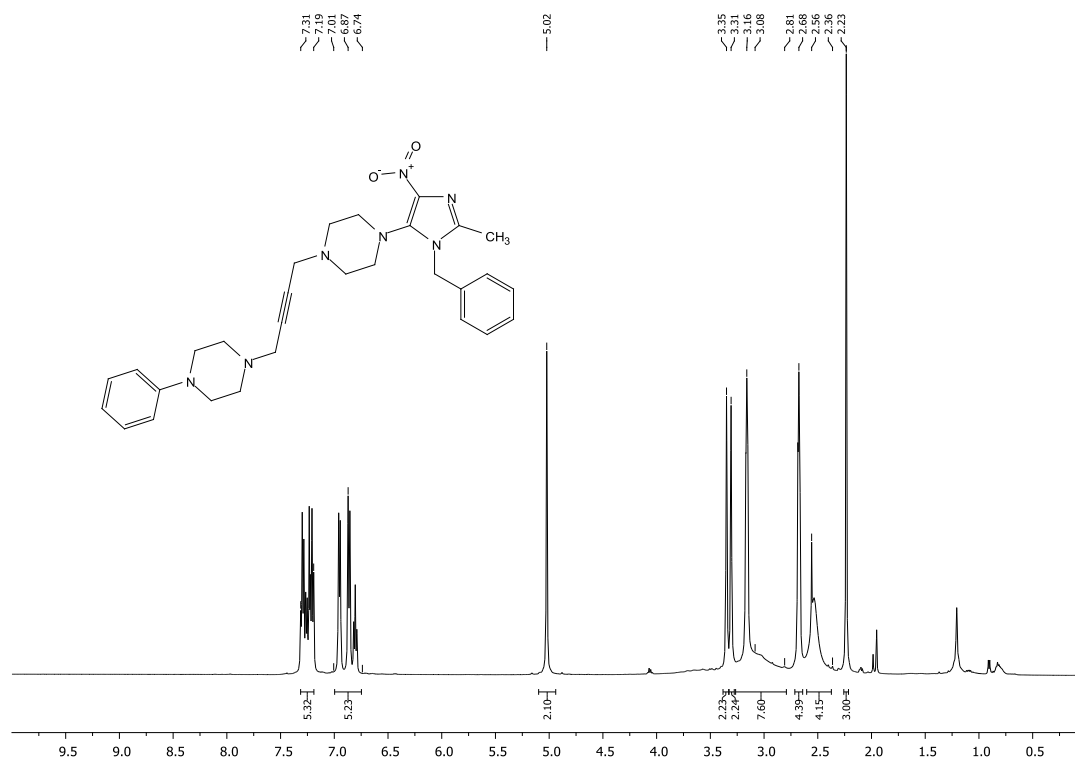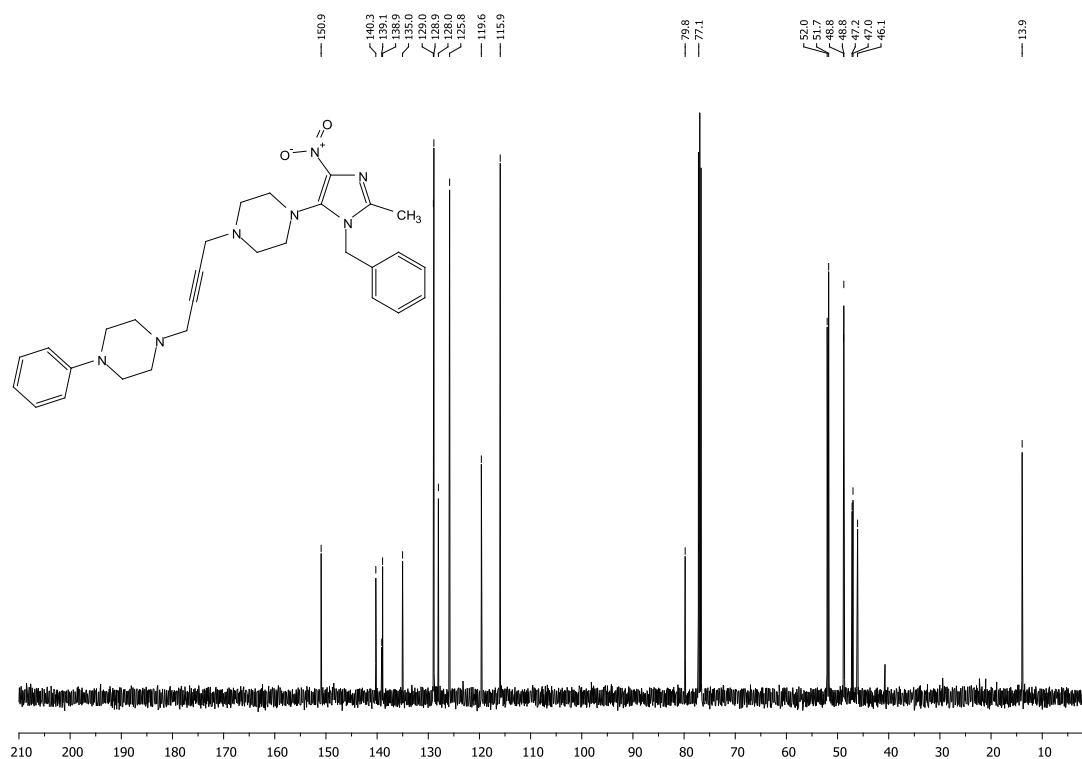

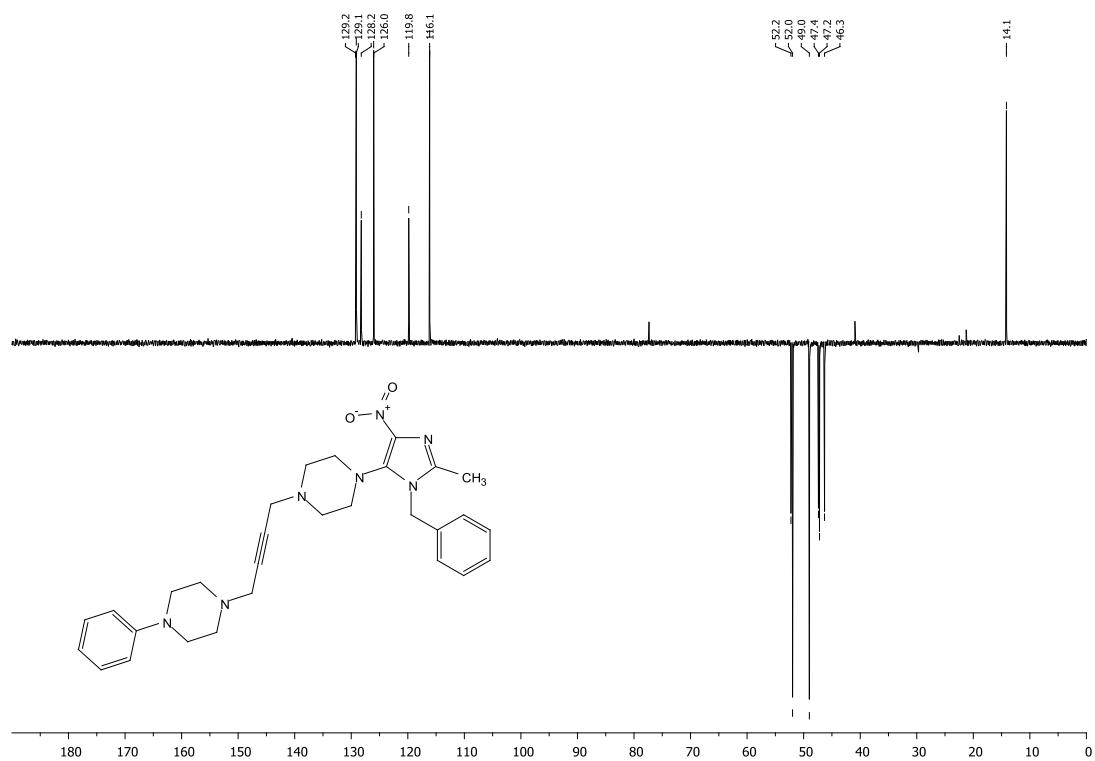

# Compound 10b

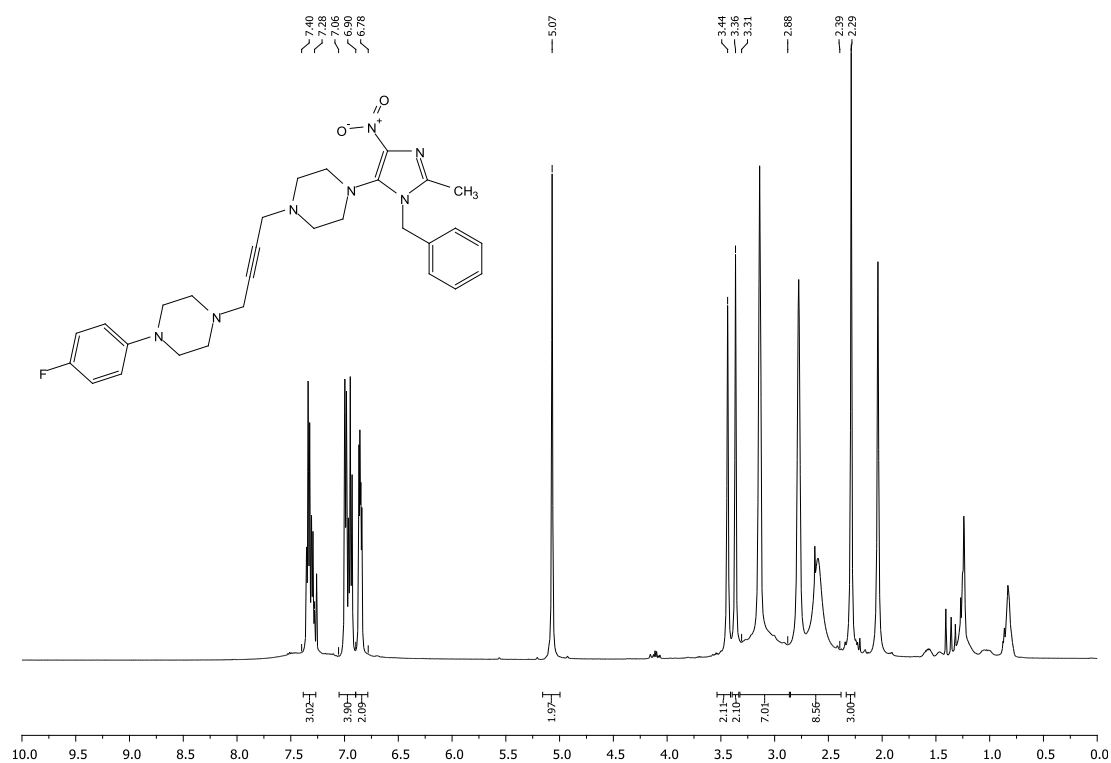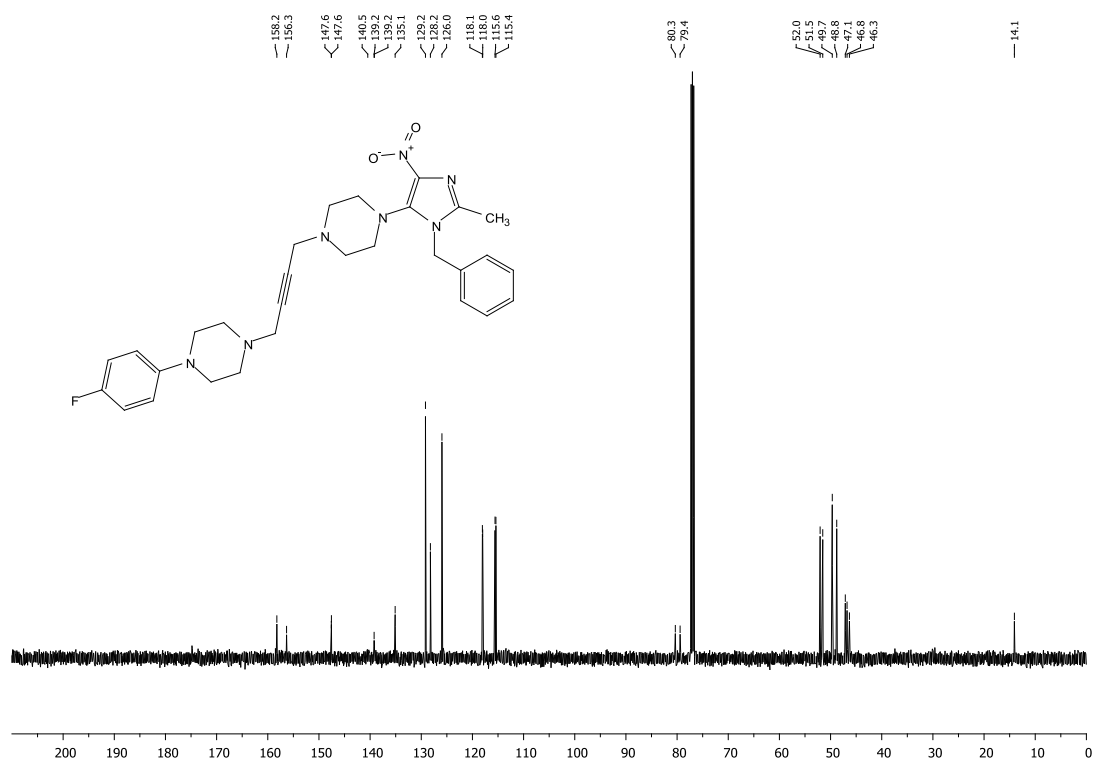

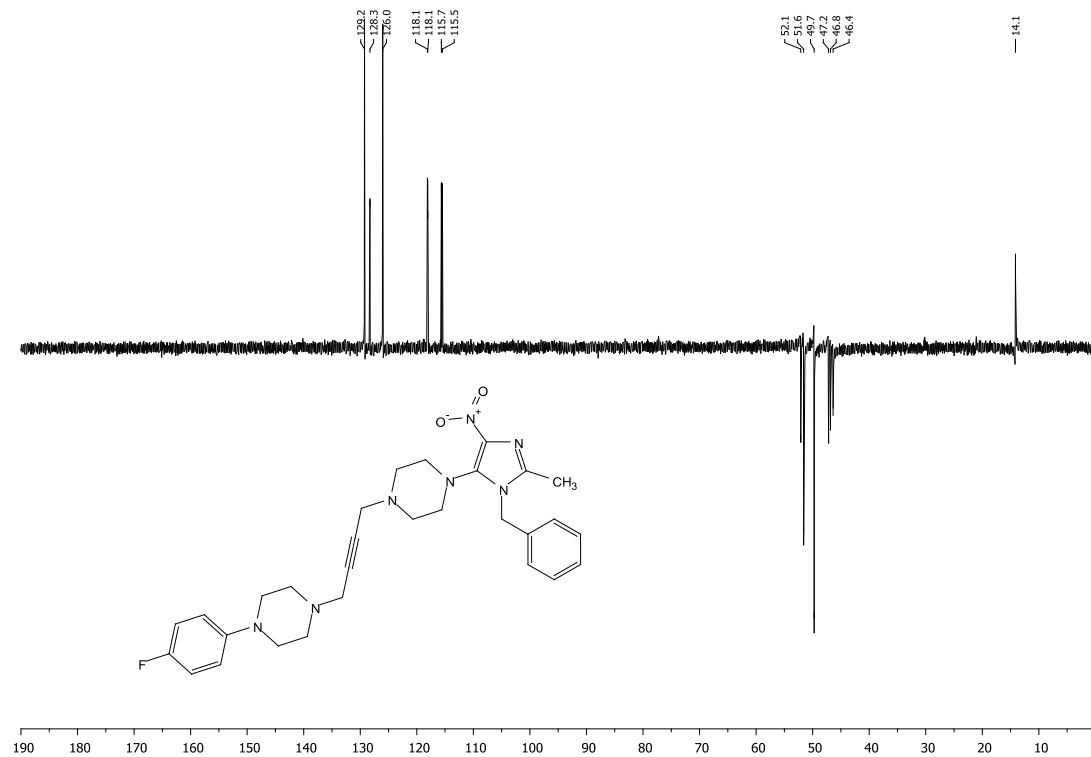

# Compound 10c

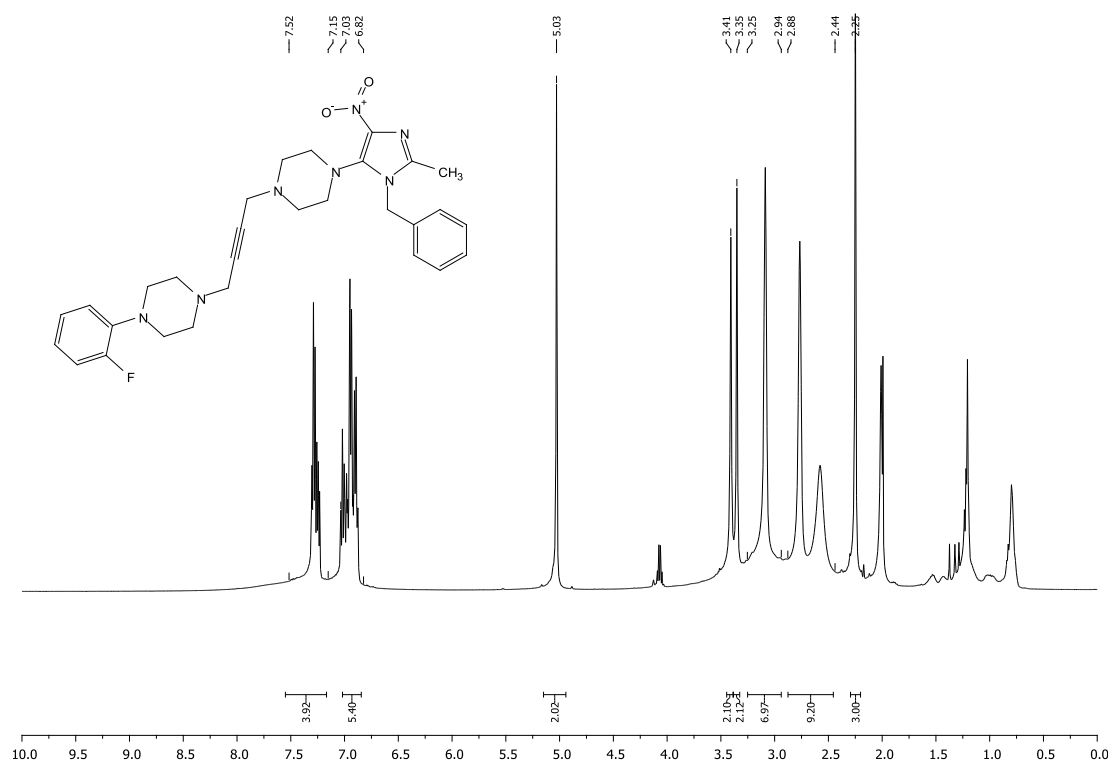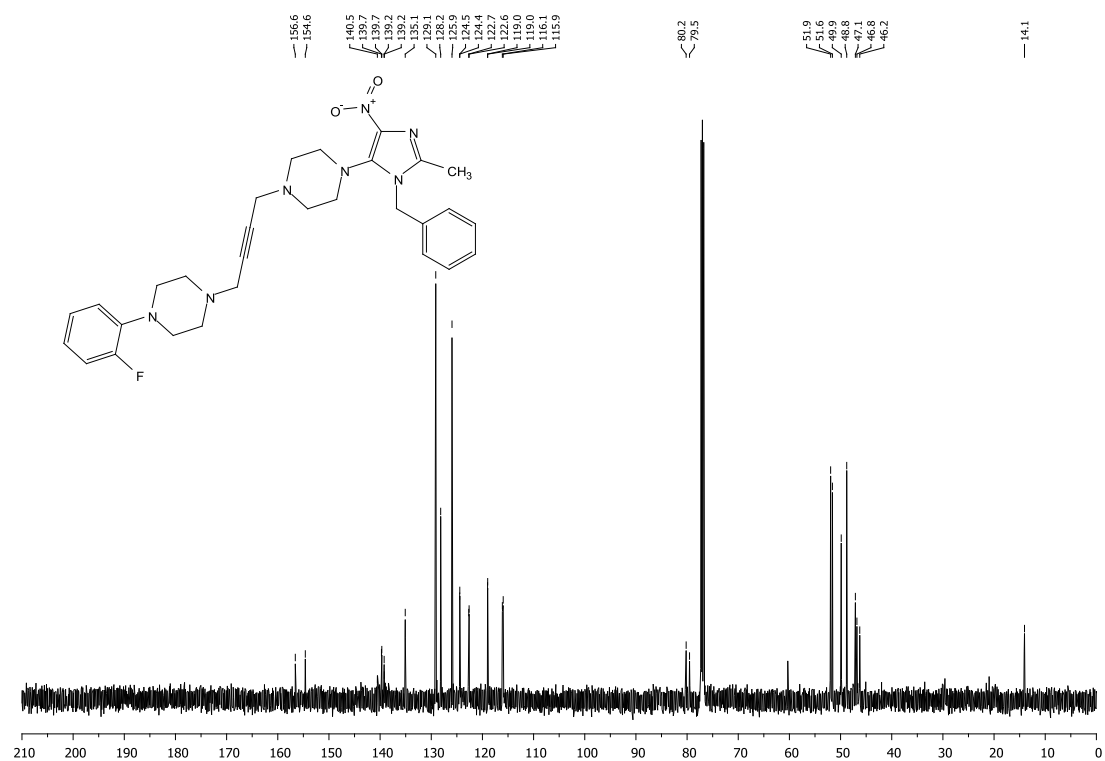



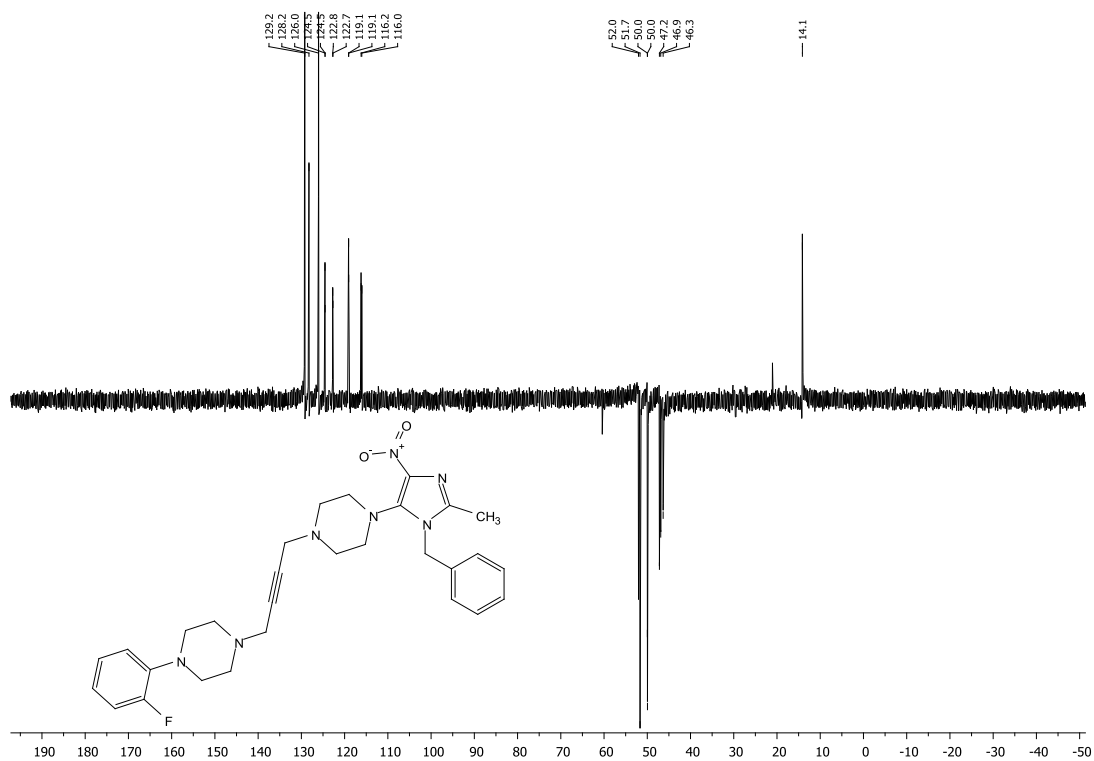

# Compound 10d

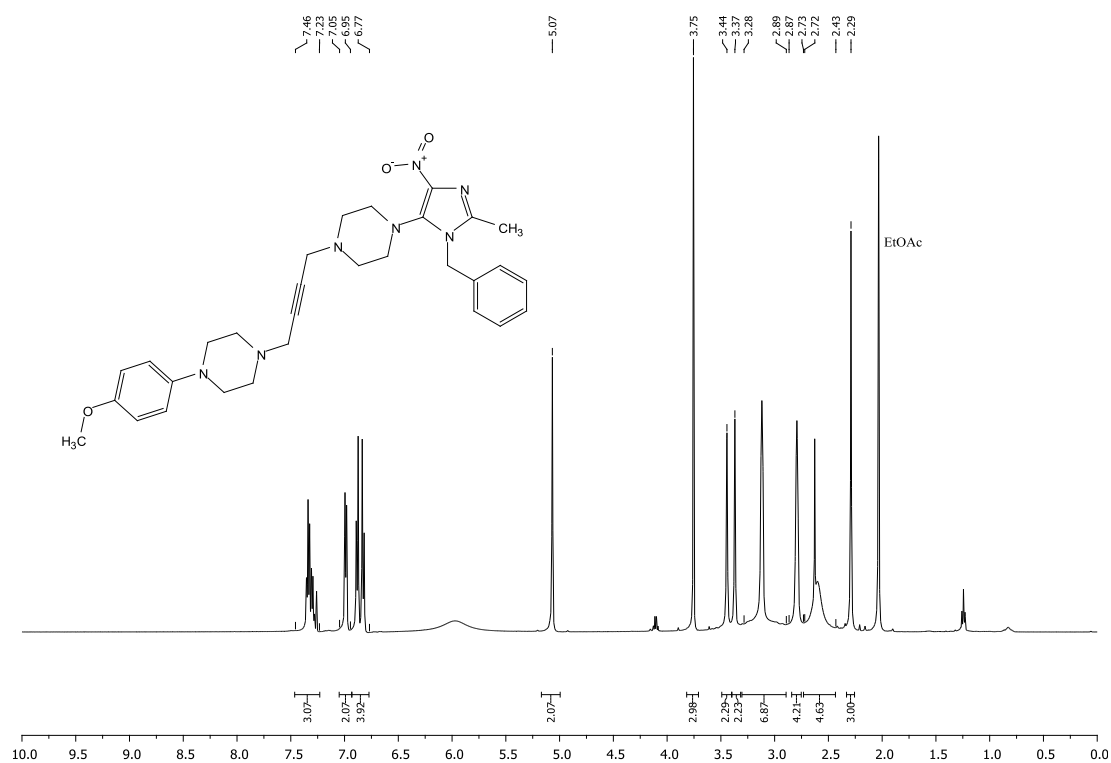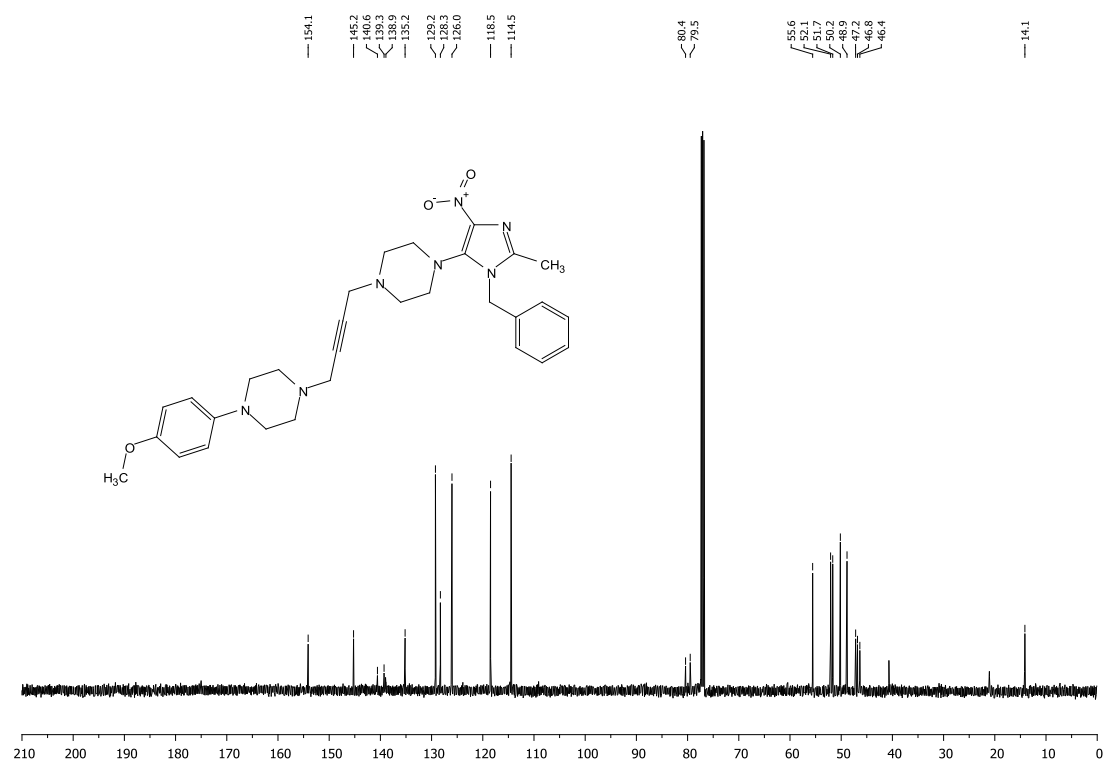

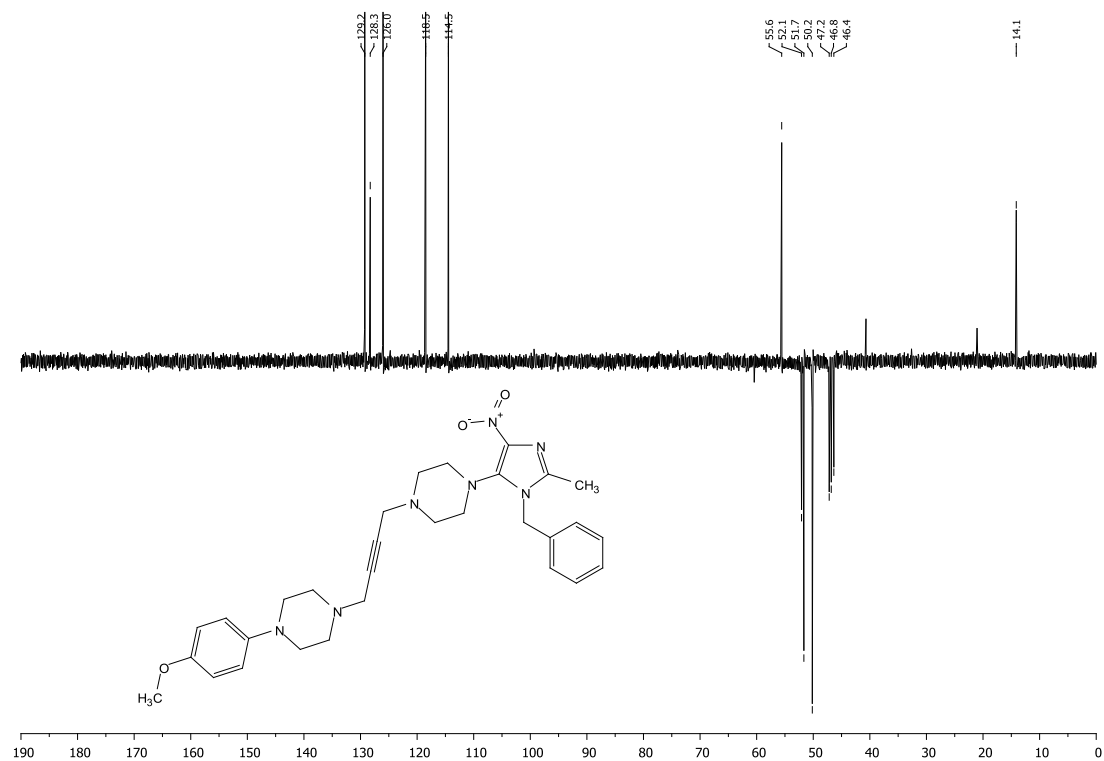

# Compound 10e

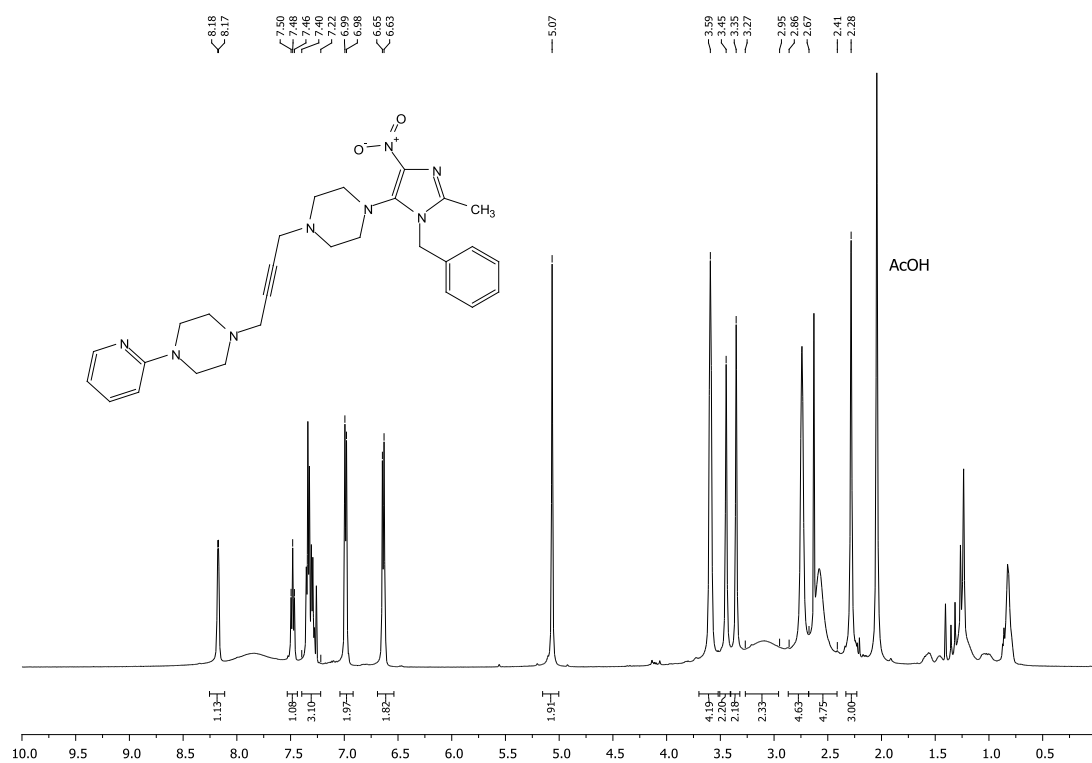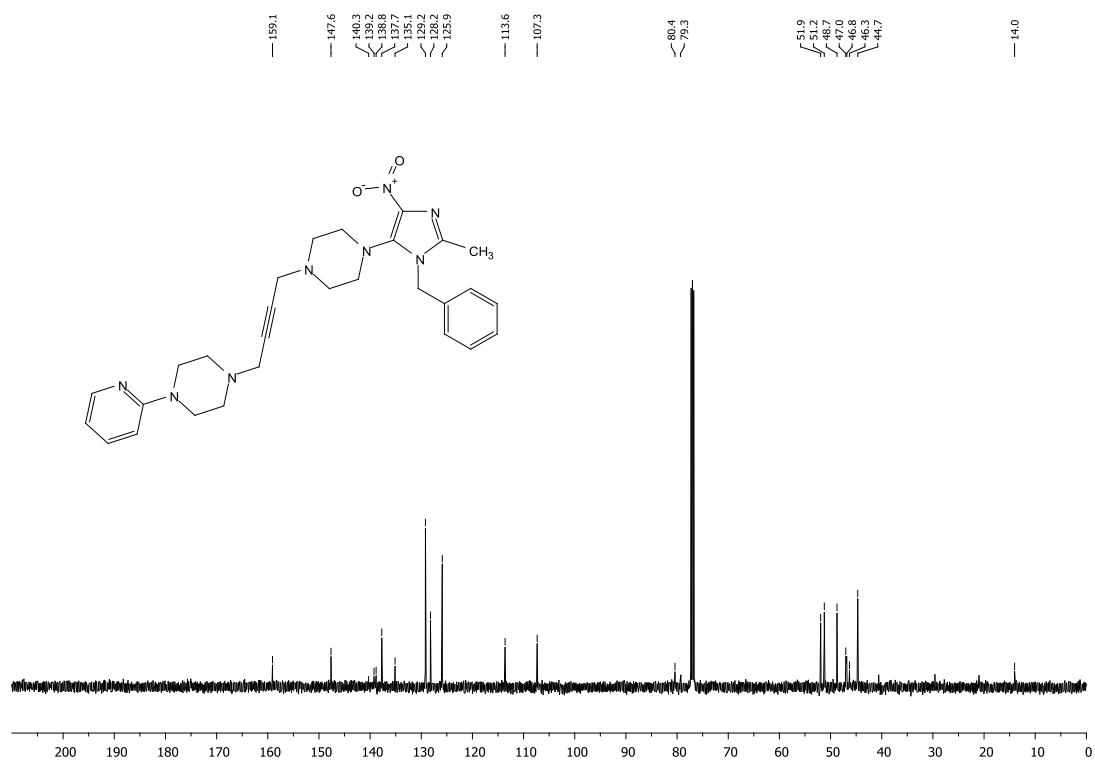

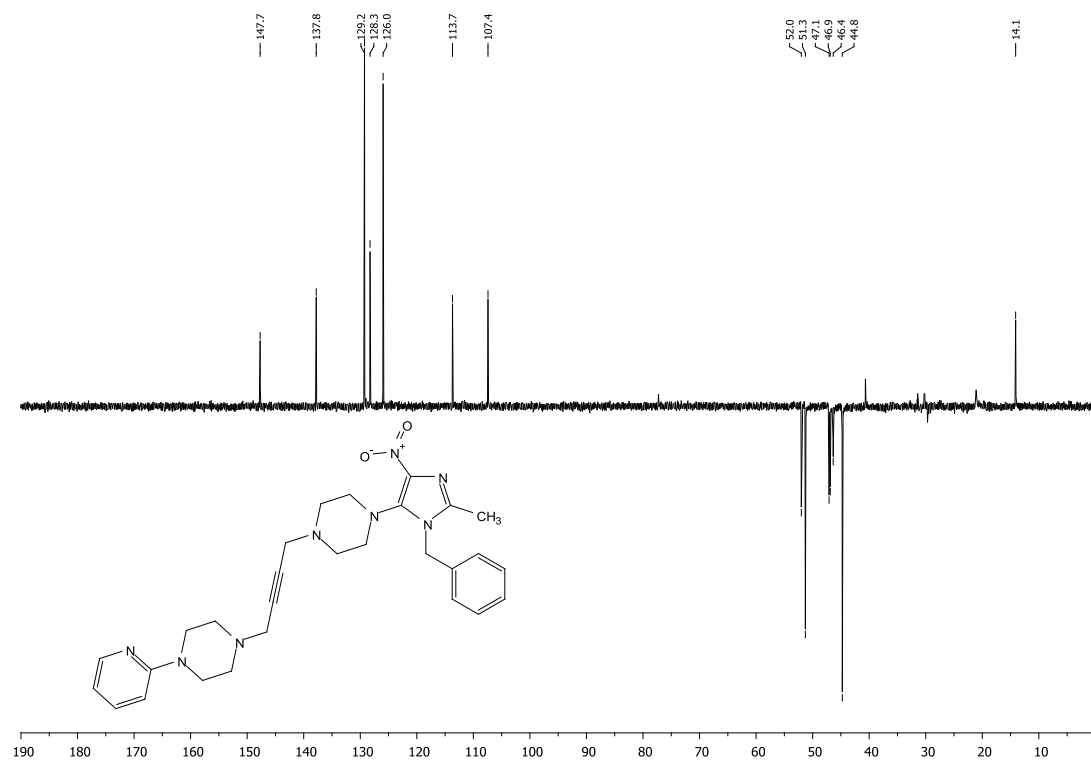

# Compound 10f

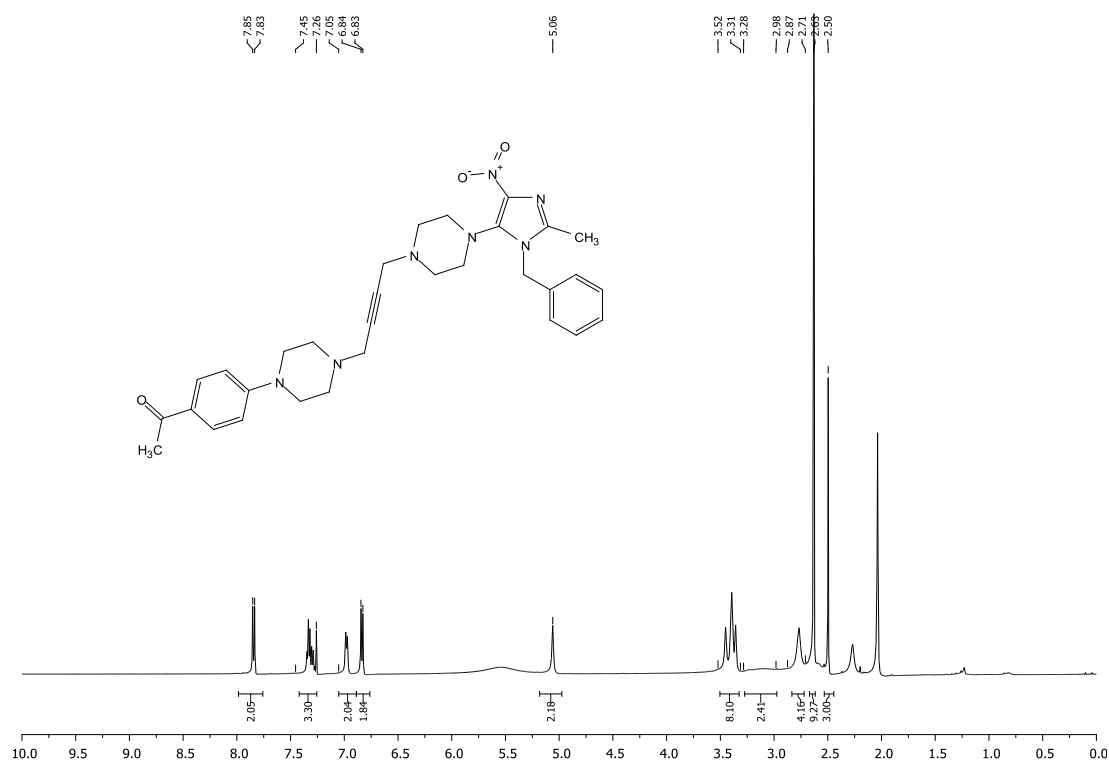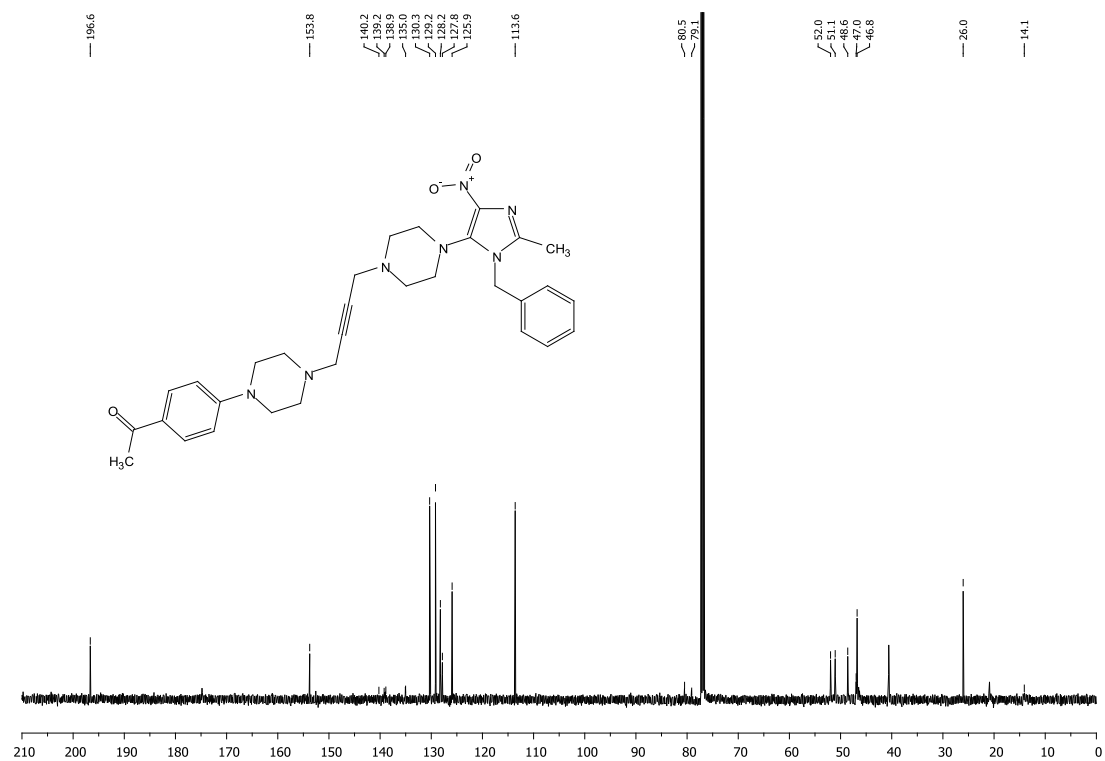

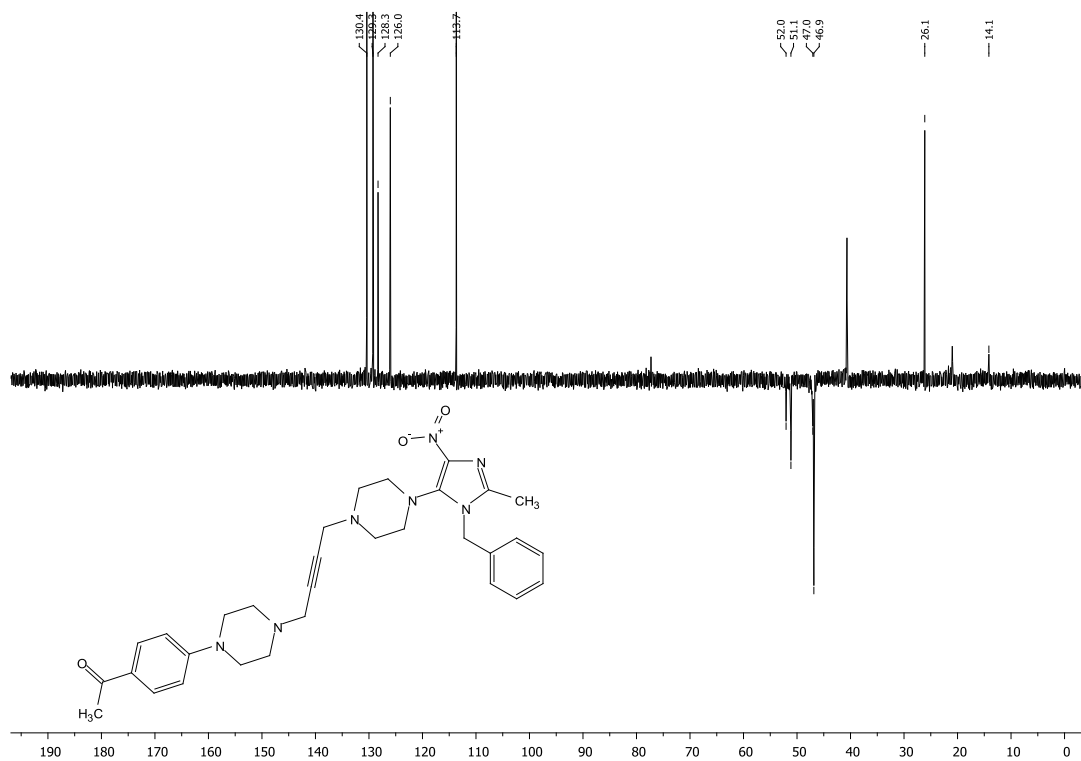

Chemical structure of compound 10 is shown above the spectrum. The structure is 1-(2-(2-(2-hydroxyethyl)azepan-1-yl)ethynyl)-2-methyl-4-nitro-1H-imidazole-5-ylbenzene.

<sup>1</sup>H NMR spectrum (DMSO-d<sub>6</sub>) of compound 10. The x-axis represents chemical shift in ppm, ranging from 0.5 to 10.0. The spectrum shows several peaks corresponding to the structure, with integration values provided below the baseline.

Chemical shift values (ppm) and integration values are listed above and below the spectrum, respectively:

- Chemical shift values: 7.45, 7.20, 7.06, 6.82, 5.05, 3.68, 3.24, 3.18, 2.98, 2.89, 2.42, 2.25.
- Integration values: 3.03, 2.04, 2.00, 2.11, 5.08, 2.37, 15.13, 3.47.

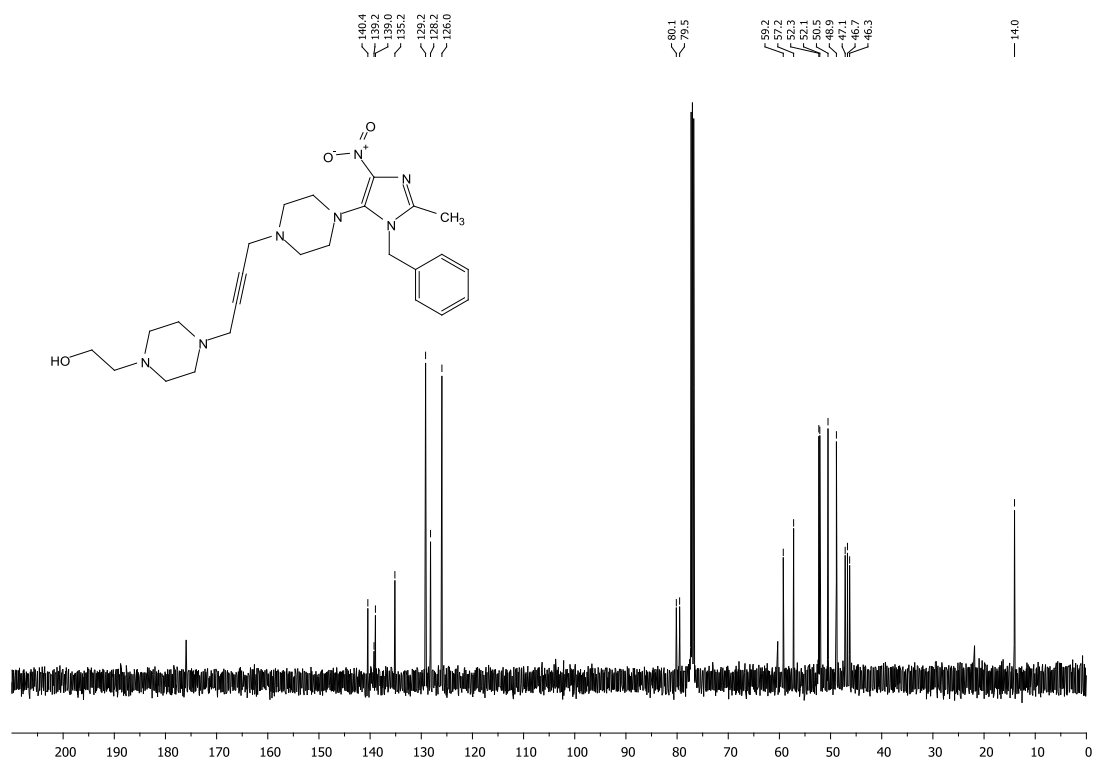



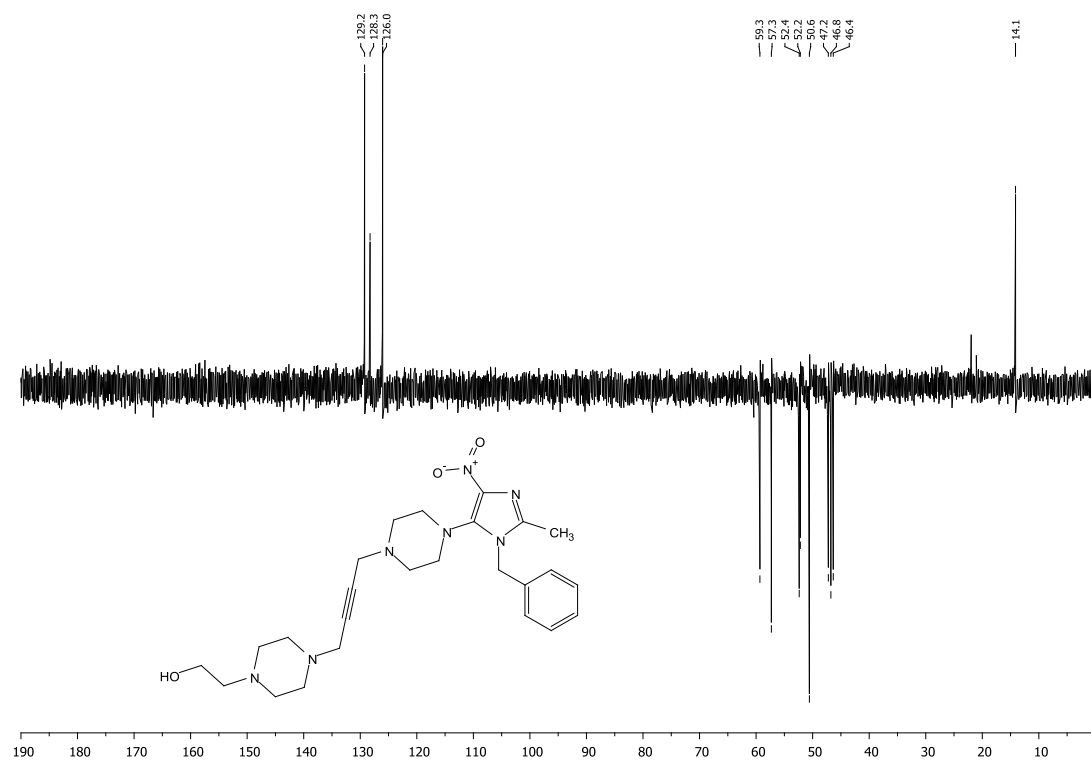

# Compound 10h

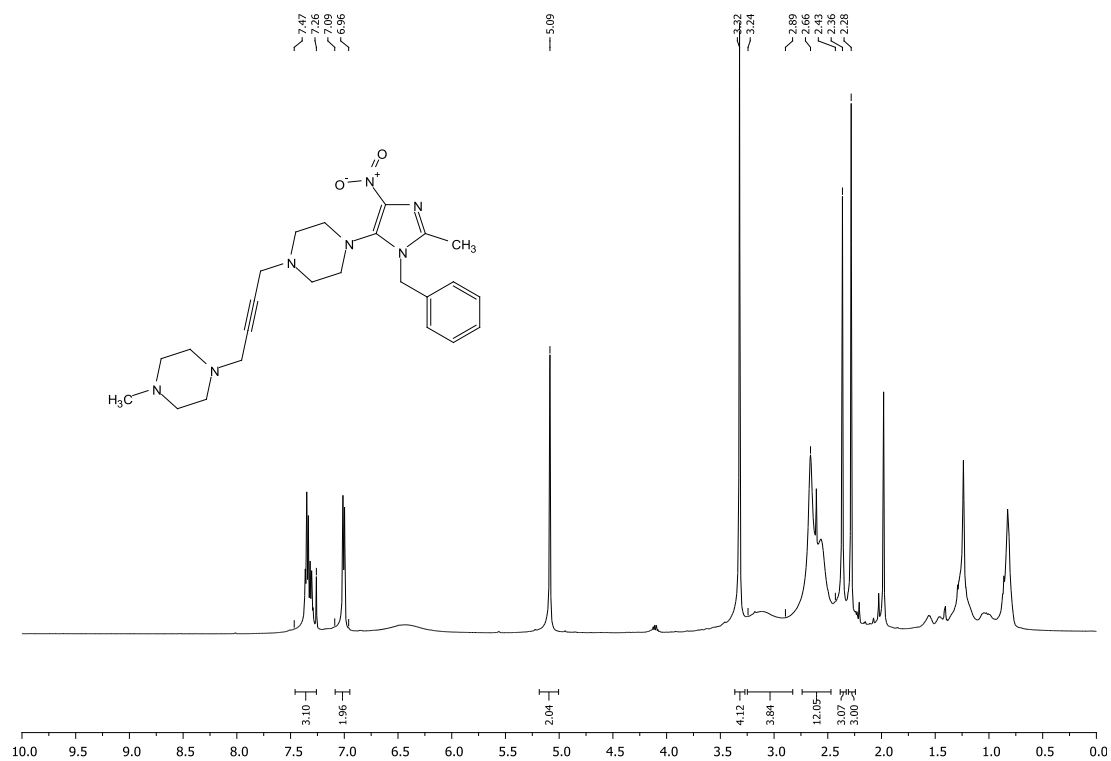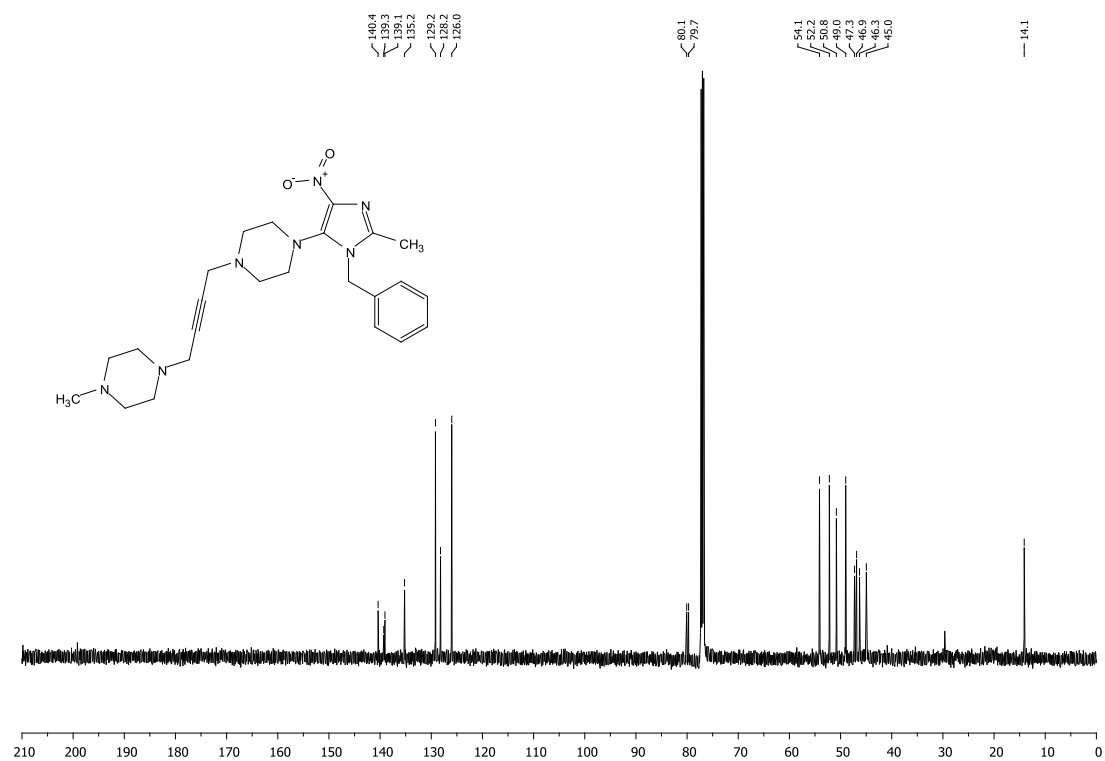

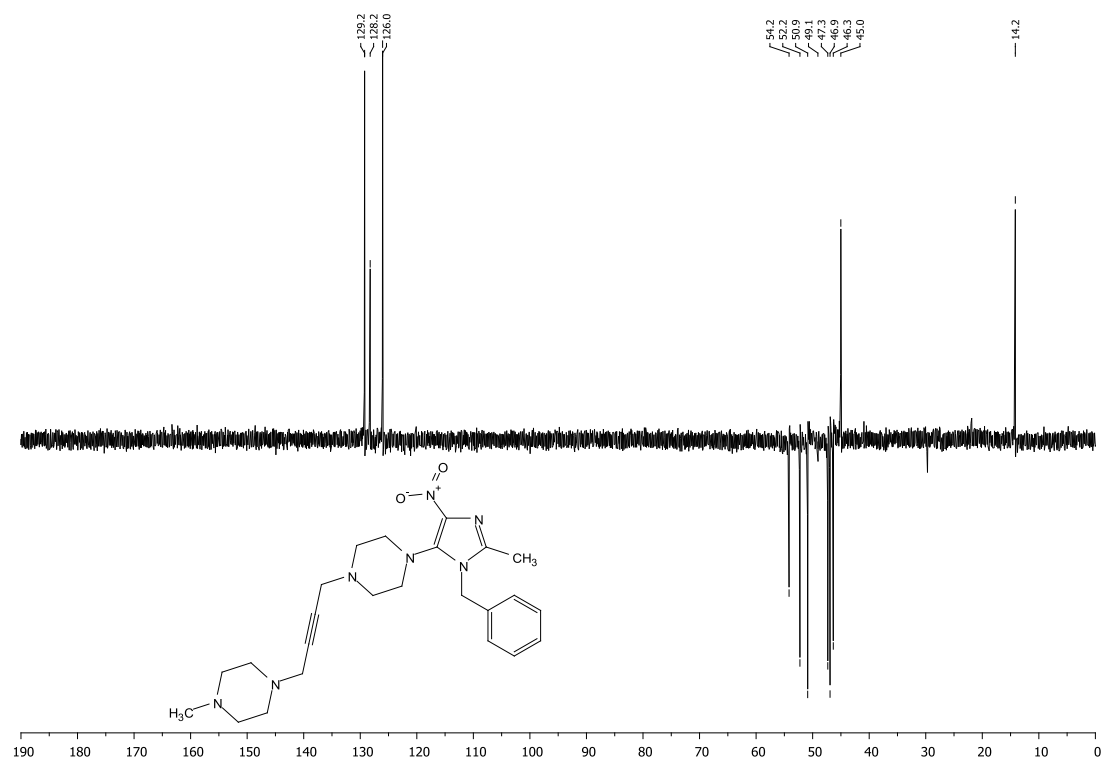

# Compound 10i

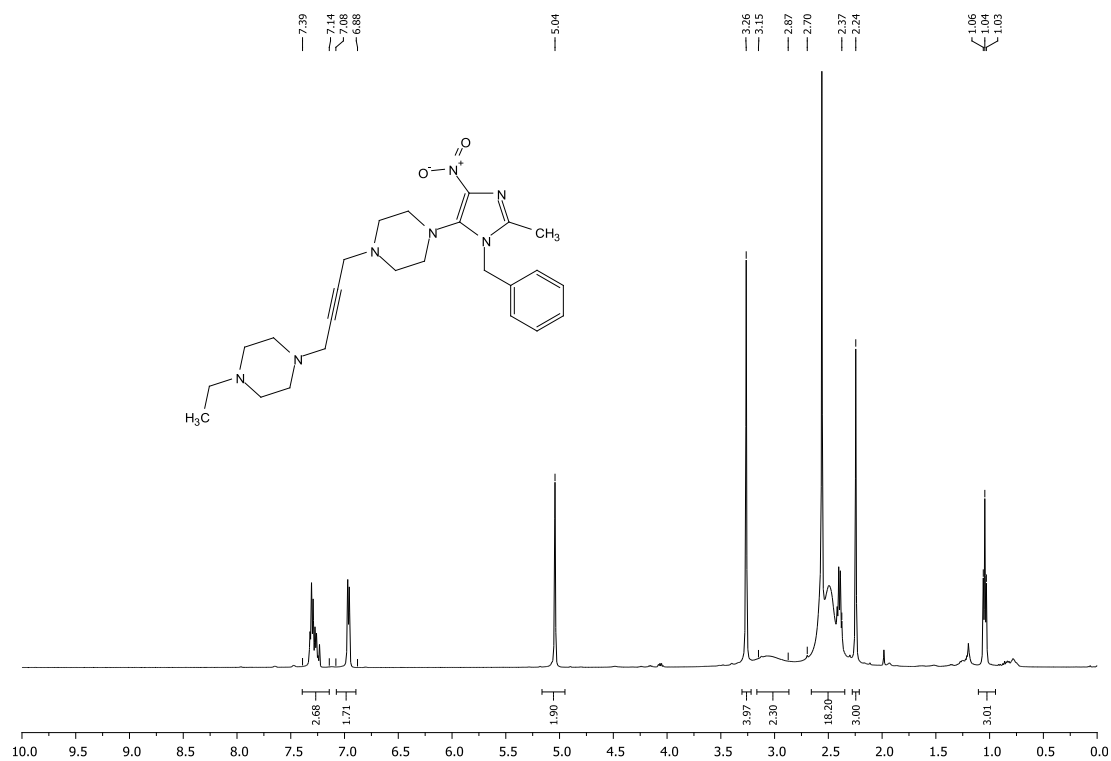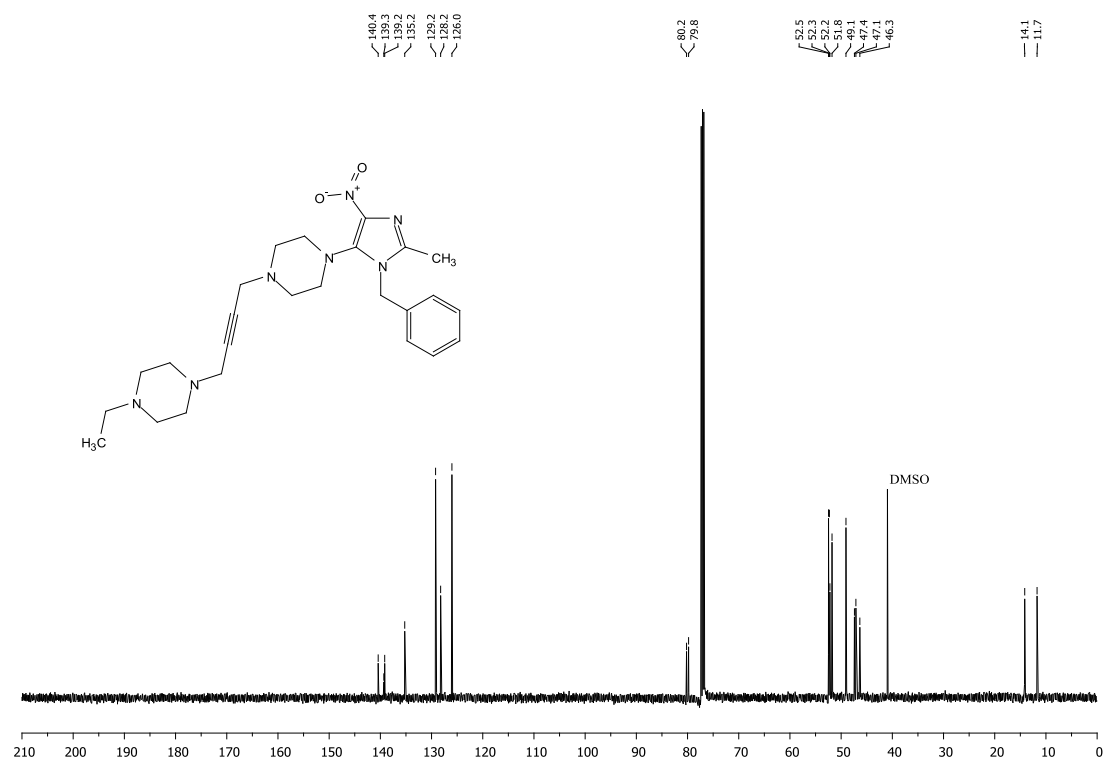

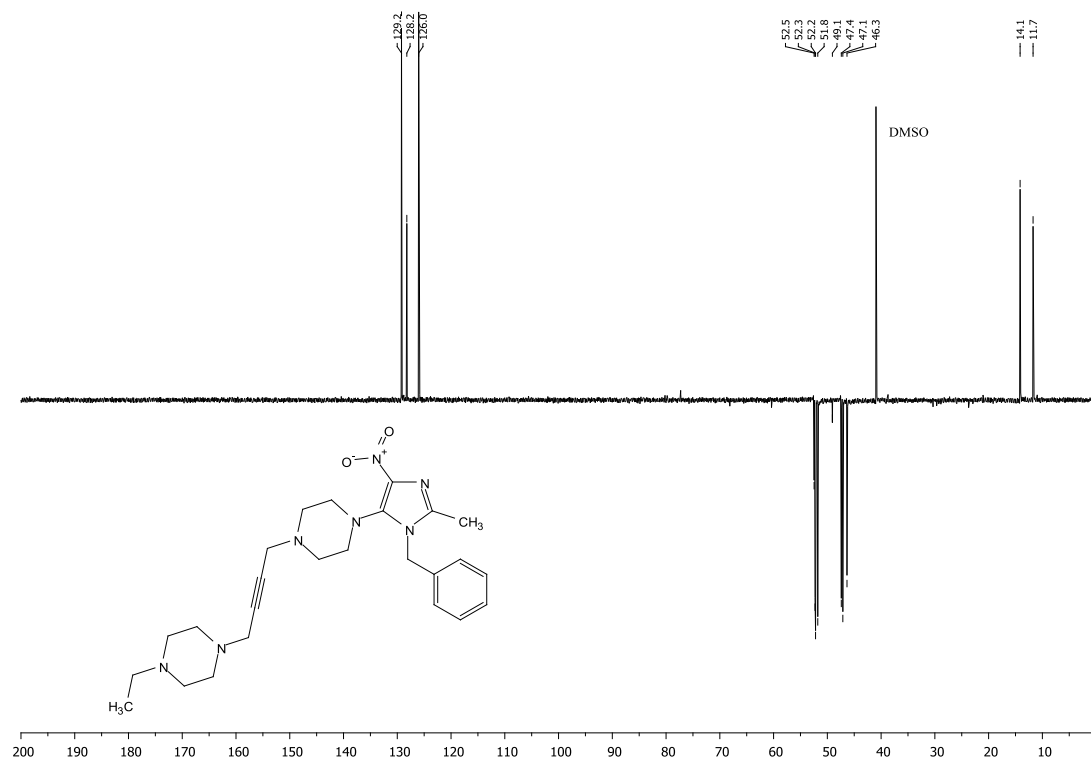

# Compound 10j

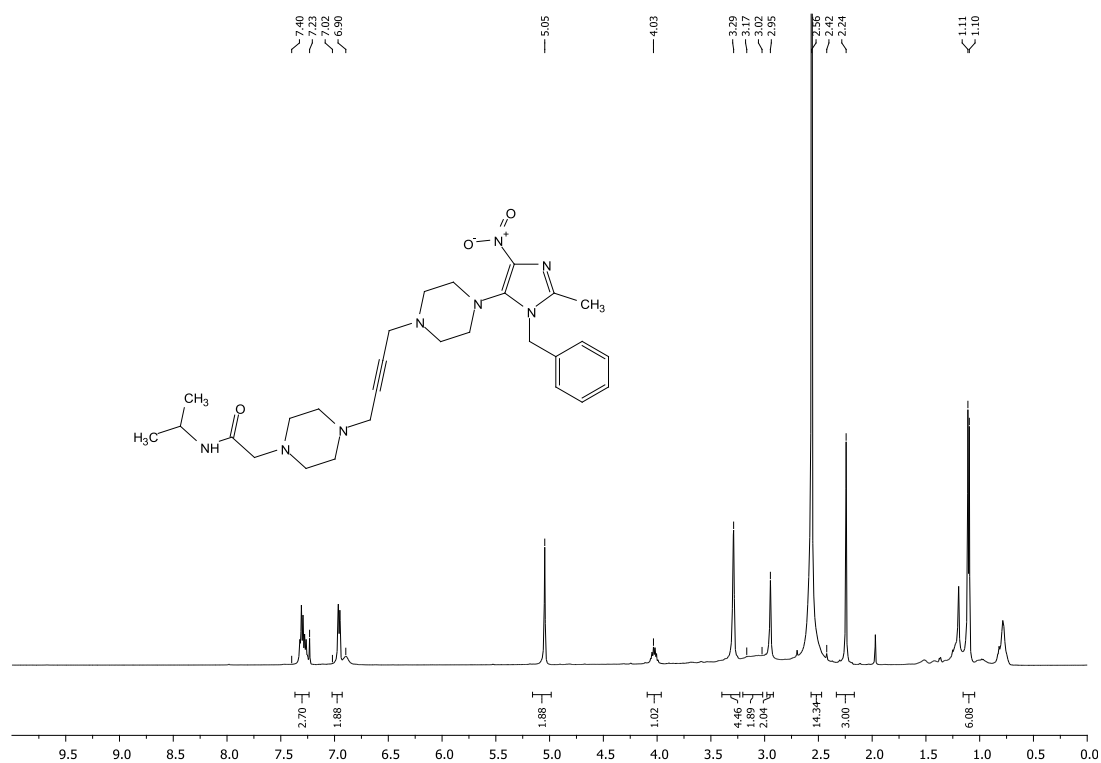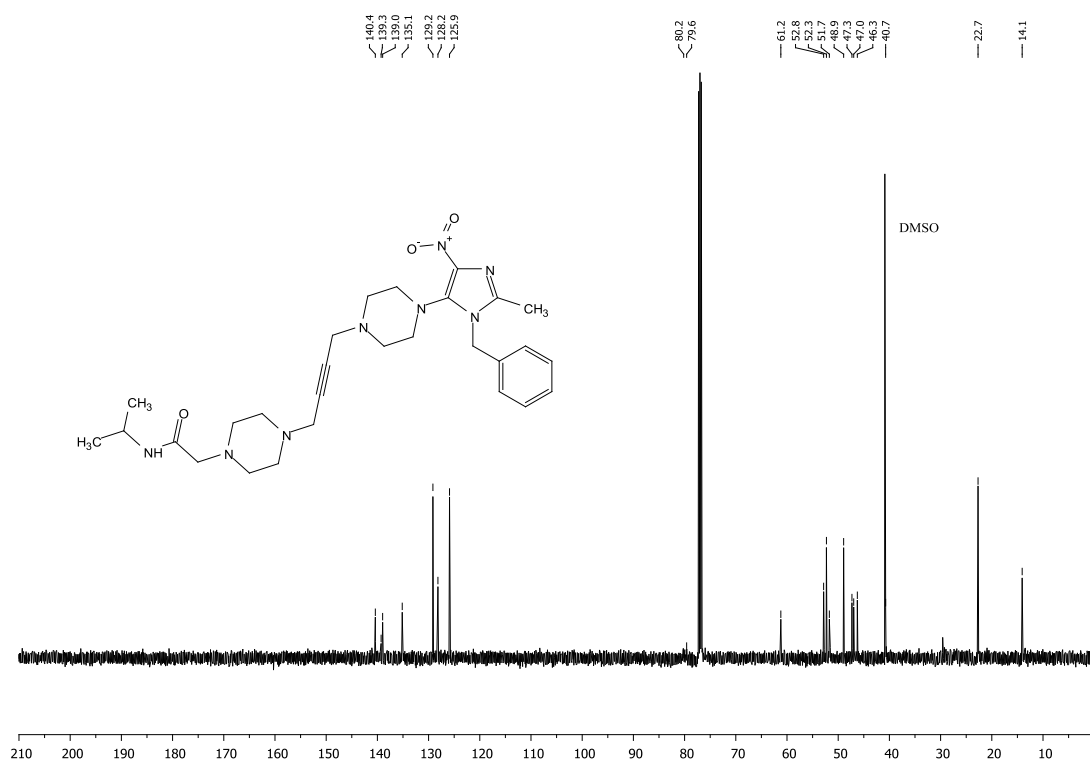

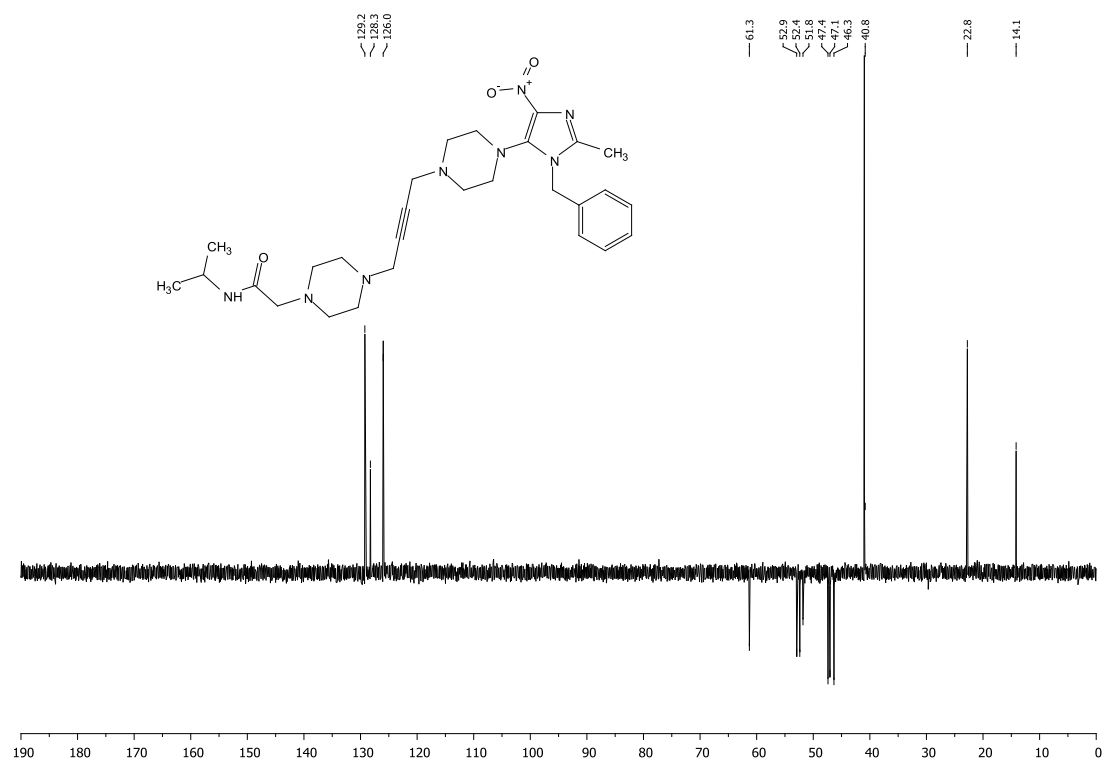

Chemical structure of the compound is shown above the spectrum. The structure is a complex molecule featuring a thiomorpholine ring connected via an alkyne linker to a piperazine ring, which is further connected to a 4-methyl-5-nitro-1-phenyl-1H-imidazole moiety.

<sup>1</sup>H NMR spectrum (CDCl<sub>3</sub>) showing peaks in the aromatic region (6.5-7.5 ppm) and aliphatic region (1.0-3.5 ppm). The spectrum includes integration values and chemical shift markers.

Chemical shift markers (ppm): 7.46, 7.26, 7.08, 6.88, 5.09, 3.36, 3.24, 2.97, 2.83, 2.74, 2.41, 2.28.

Integration values: 2.69, 1.89, 1.99, 4.32, 2.05, 4.51, 8.79, 3.00.

Peak assignments: Aromatic protons (7.0-7.5 ppm), Imidazole CH (5.1 ppm), Alkyne protons (3.3-3.4 ppm), Methyl protons (2.7-3.0 ppm), Solvent (2.4 ppm, AcOH), and other aliphatic protons (1.0-1.5 ppm).

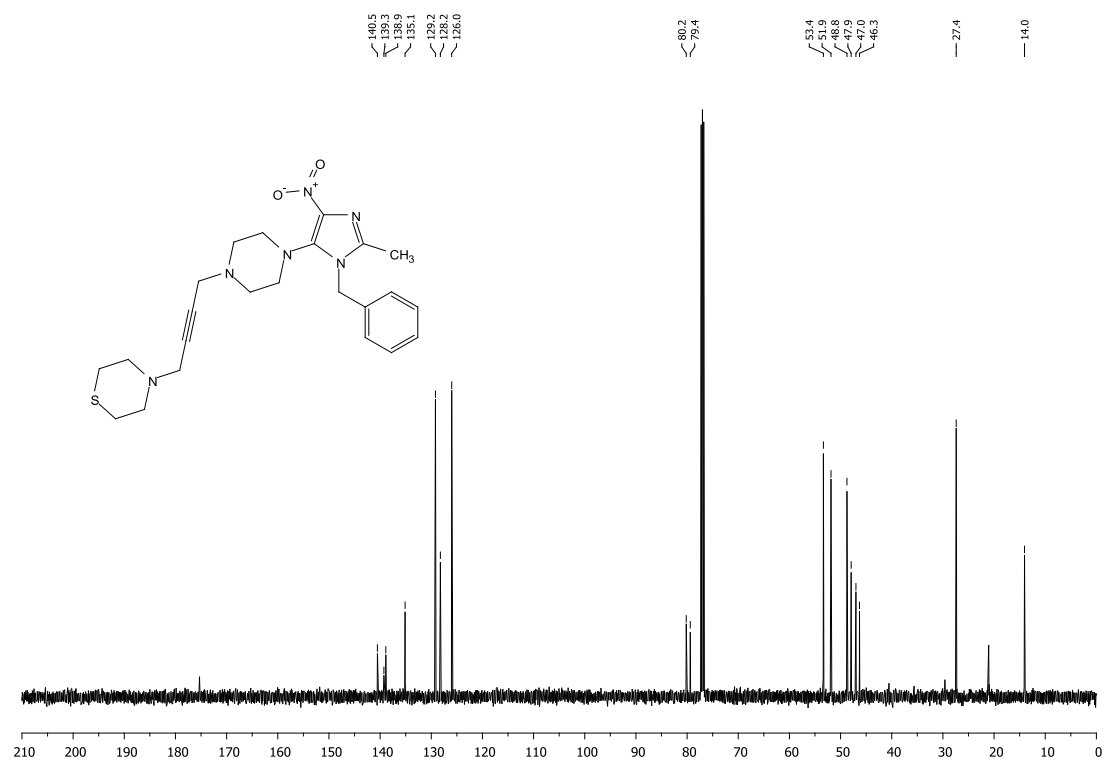



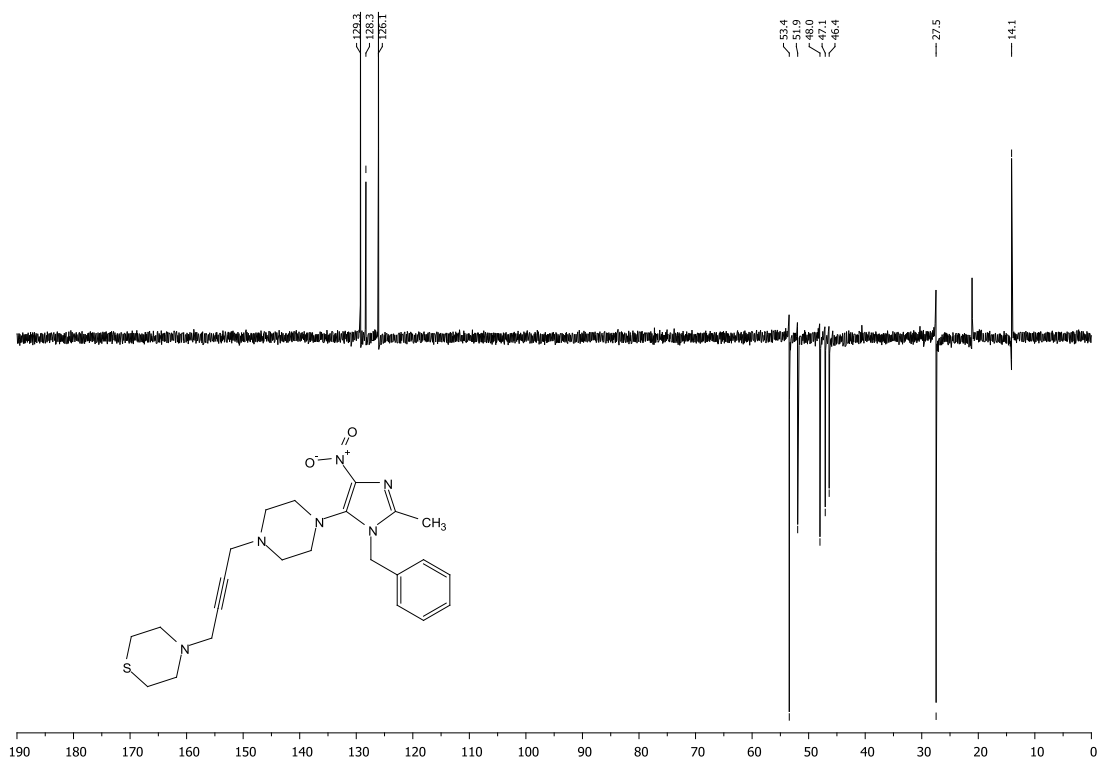

Chemical structure of compound 10 is shown above the  $^1\text{H}$  NMR spectrum. The structure is a 1-methyl-2-((4-((4-morpholin-4-yl)but-1-yn-1-yl)pyrrolidin-1-yl)-1H-imidazol-5-yl)-1H-imidazole-5-nitro compound.

The  $^1\text{H}$  NMR spectrum (CDCl<sub>3</sub>) shows peaks at the following chemical shifts (ppm): 7.34, 7.10, 6.98, 6.78, 4.98, 3.55, 3.20, 3.18, 3.13, 2.78, 2.48, 2.34, 2.15, 1.0, and 0.5. Integration values are provided below the peaks: 2.81, 1.84, 2.01, 3.93, 1.89, 1.89, 2.39, 9.75, and 3.00.

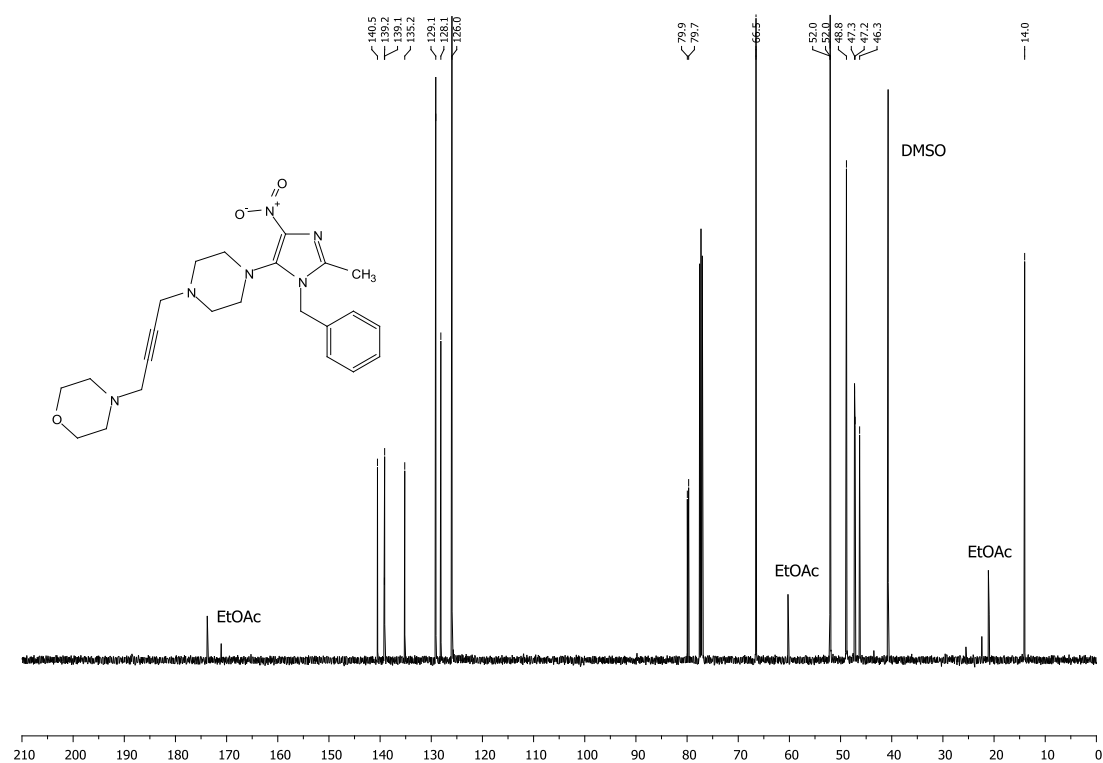

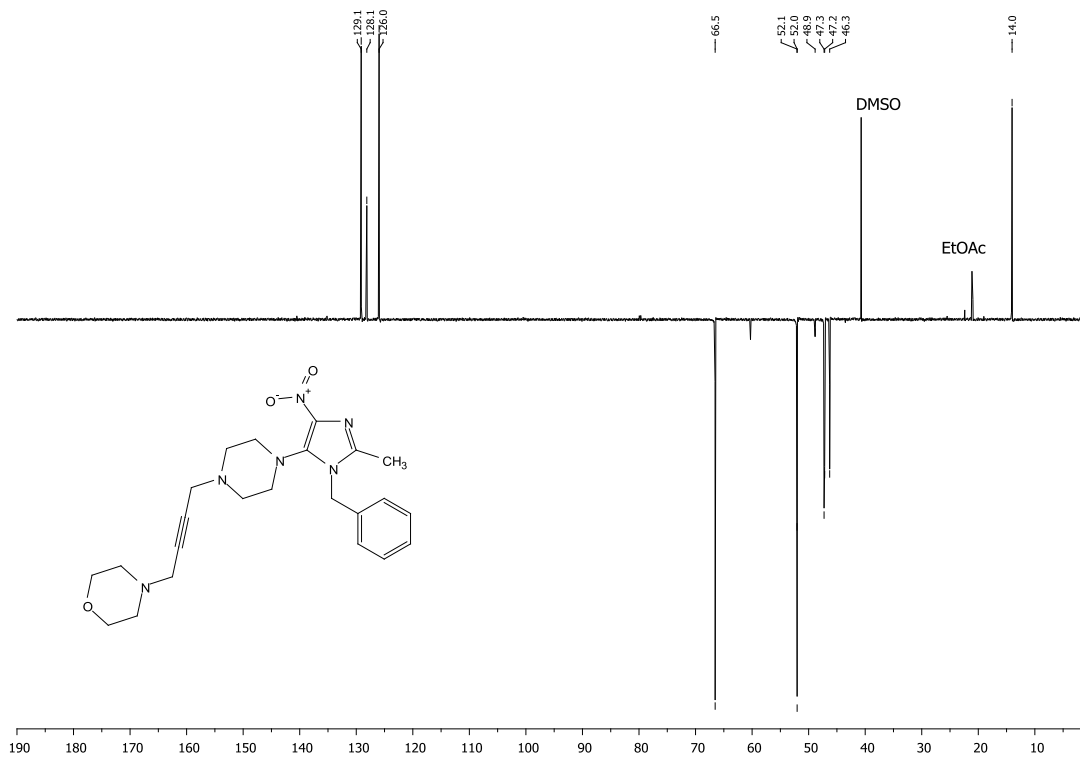

# Compound 10m

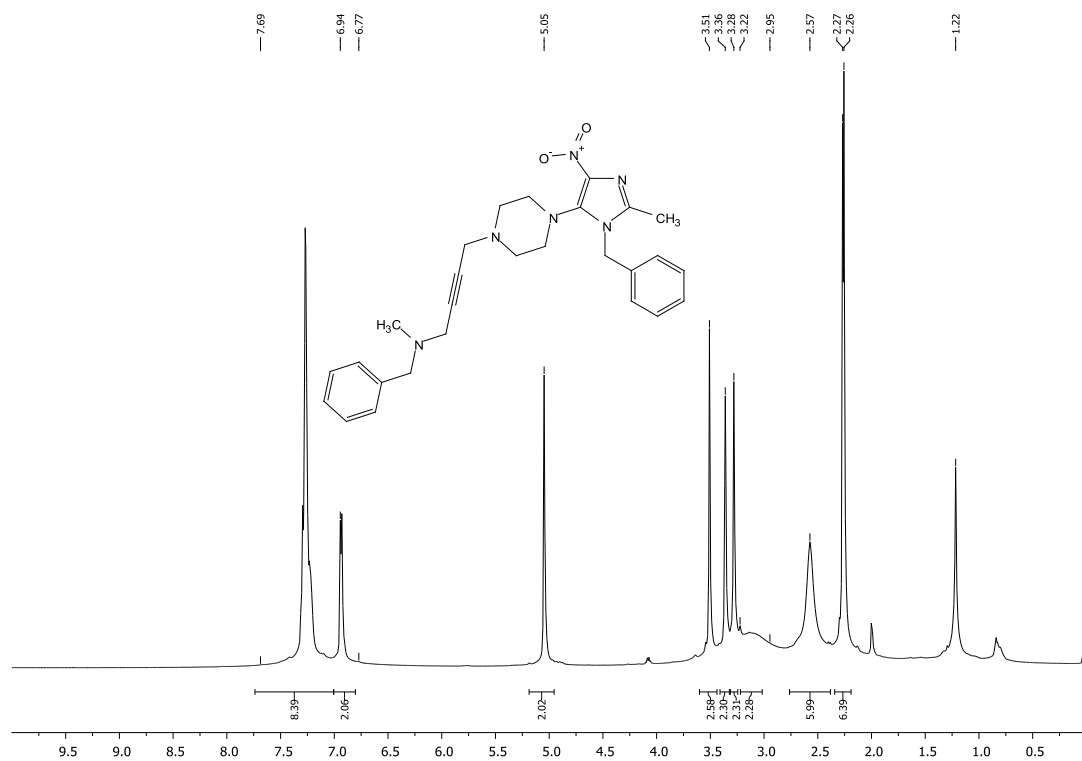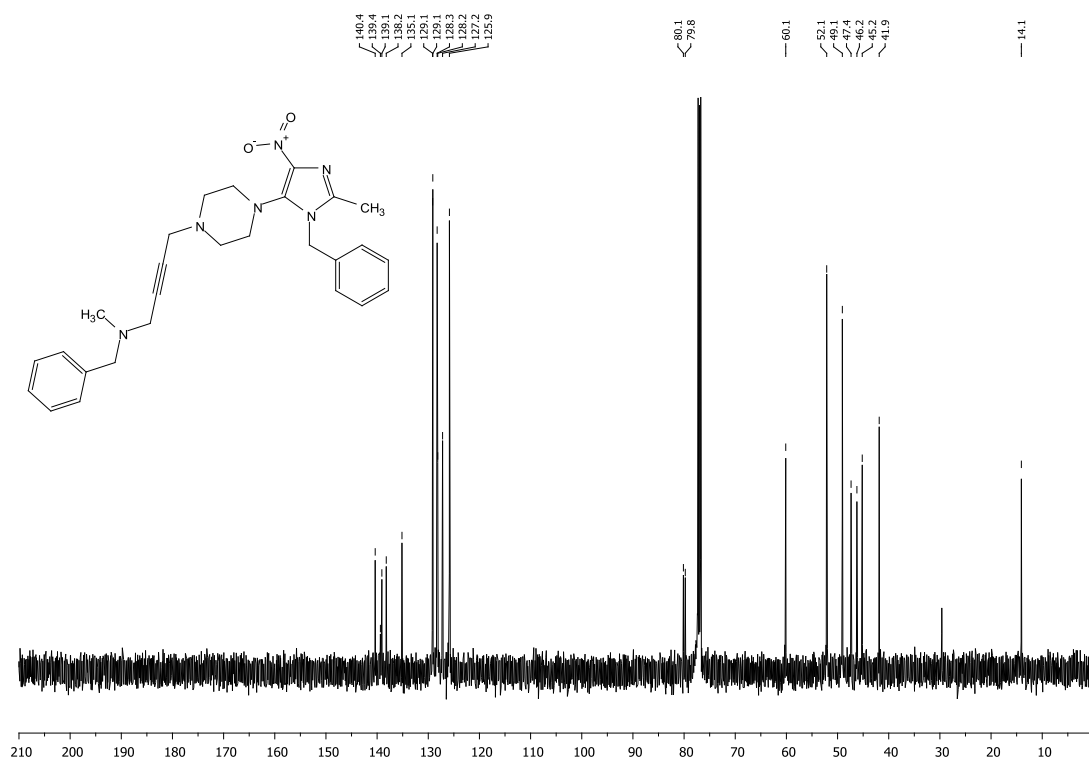

Chemical structure of compound 10 is shown above the spectrum. The structure is a 1-methyl-2-((4-(4-methyl-1-phenyl-1H-pyrazol-1-yl)but-1-yn-1-yl)benzyl)-5-nitro-1H-imidazole.

<sup>1</sup>H NMR spectrum (CDCl<sub>3</sub>) of compound 10. The x-axis represents the chemical shift in ppm, ranging from 0.0 to 10.0. The spectrum shows several peaks corresponding to the protons in the molecule. Key peaks are labeled with their chemical shifts: 7.47, 7.40, 7.38, 7.29, 7.01, 6.96, 5.09, 3.77, 3.48, 3.44, 3.37, 2.83, 2.78, 2.53, 2.29, 1.32, 1.25, 0.89. Integration values are provided below the baseline: 2.29, 6.04, 2.13, 2.12, 2.16, 2.13, 2.14, 3.79, 6.45, 3.00, 4.15, 3.37.

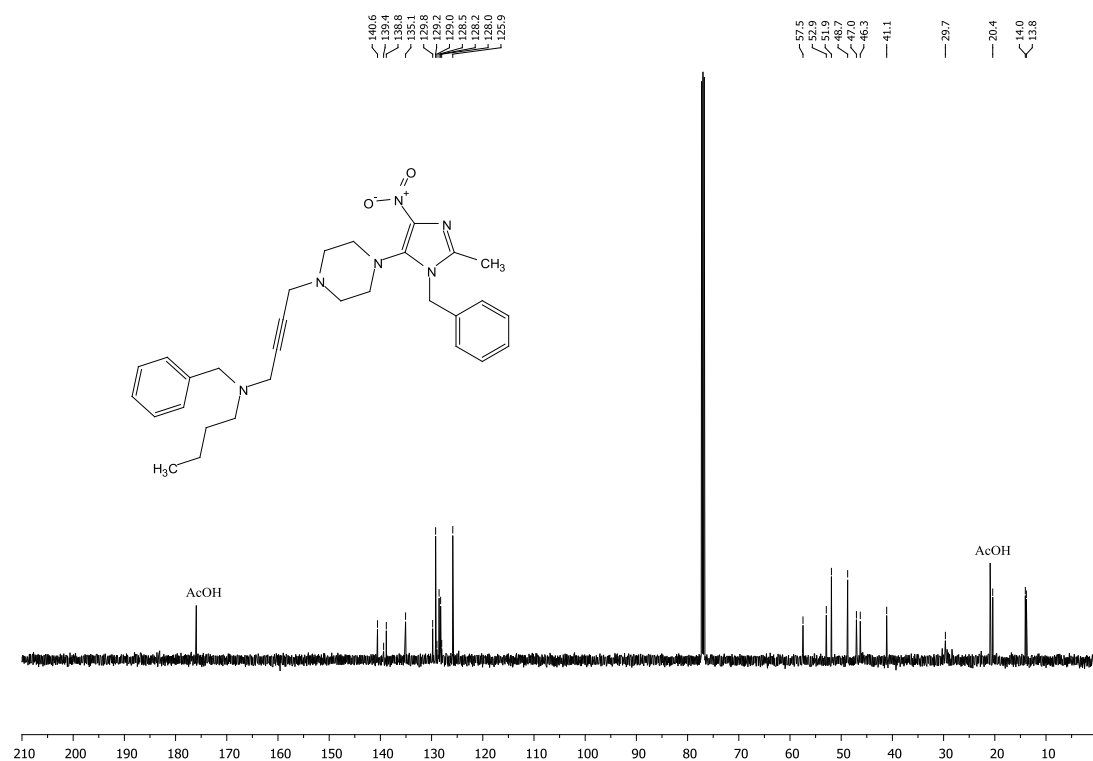

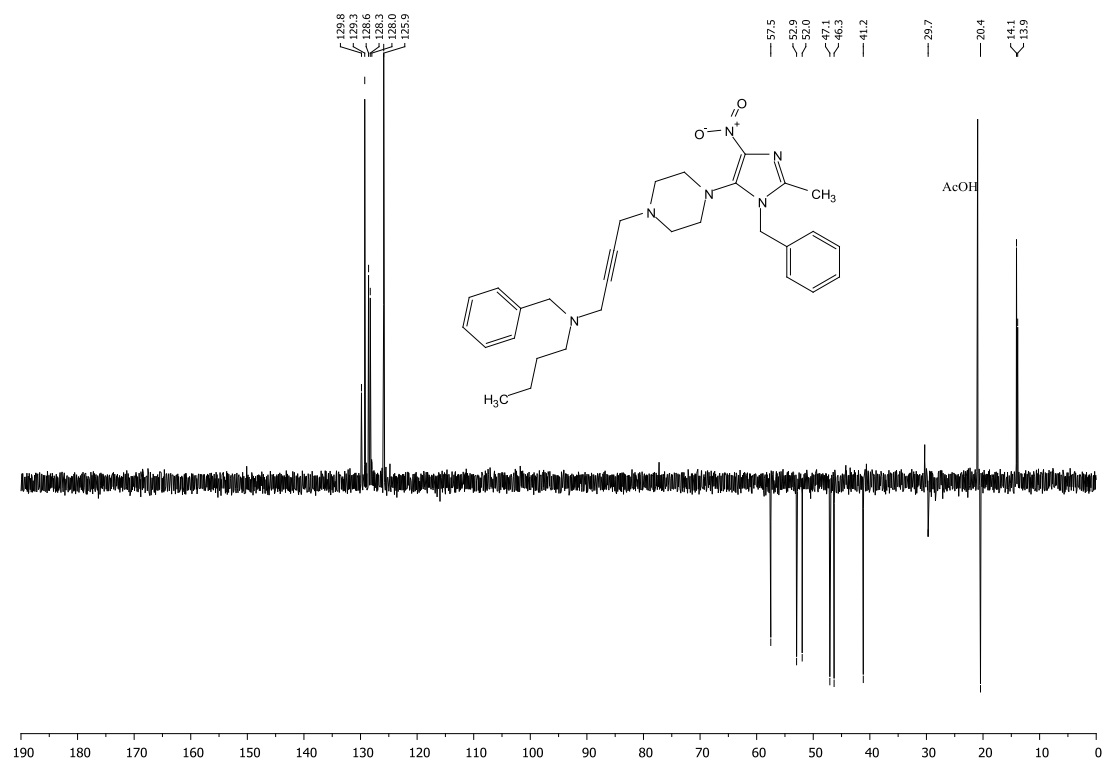

# Compound 10o

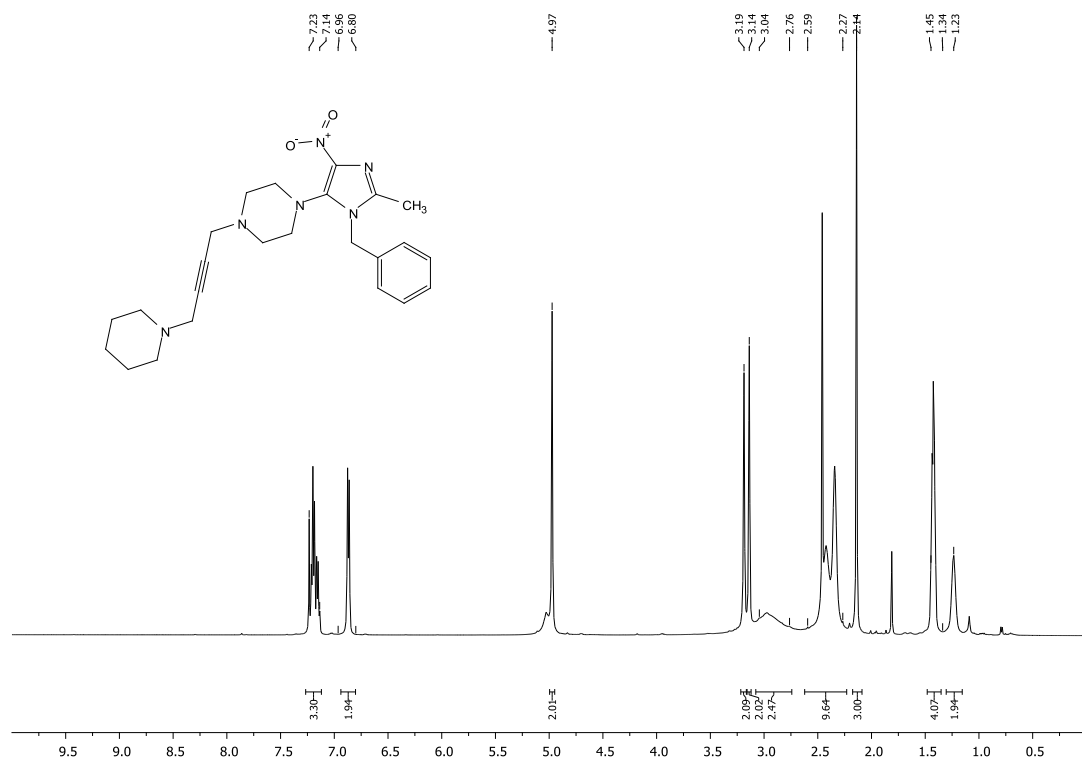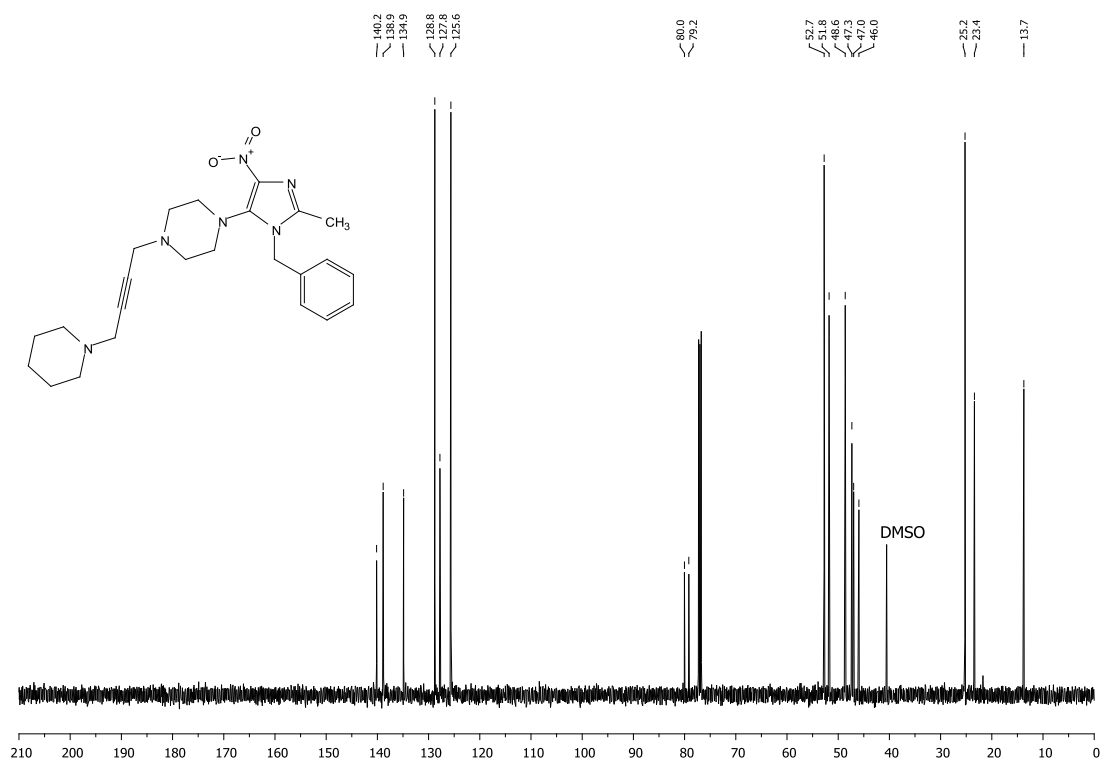

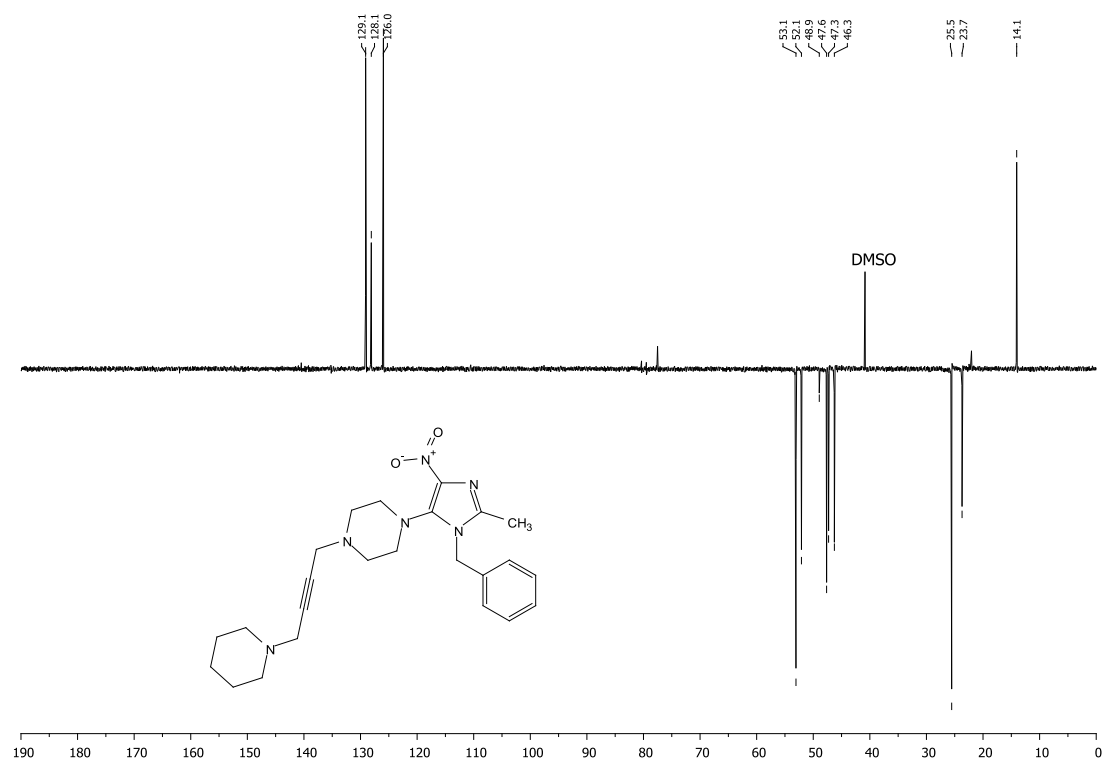



# Compound 10p

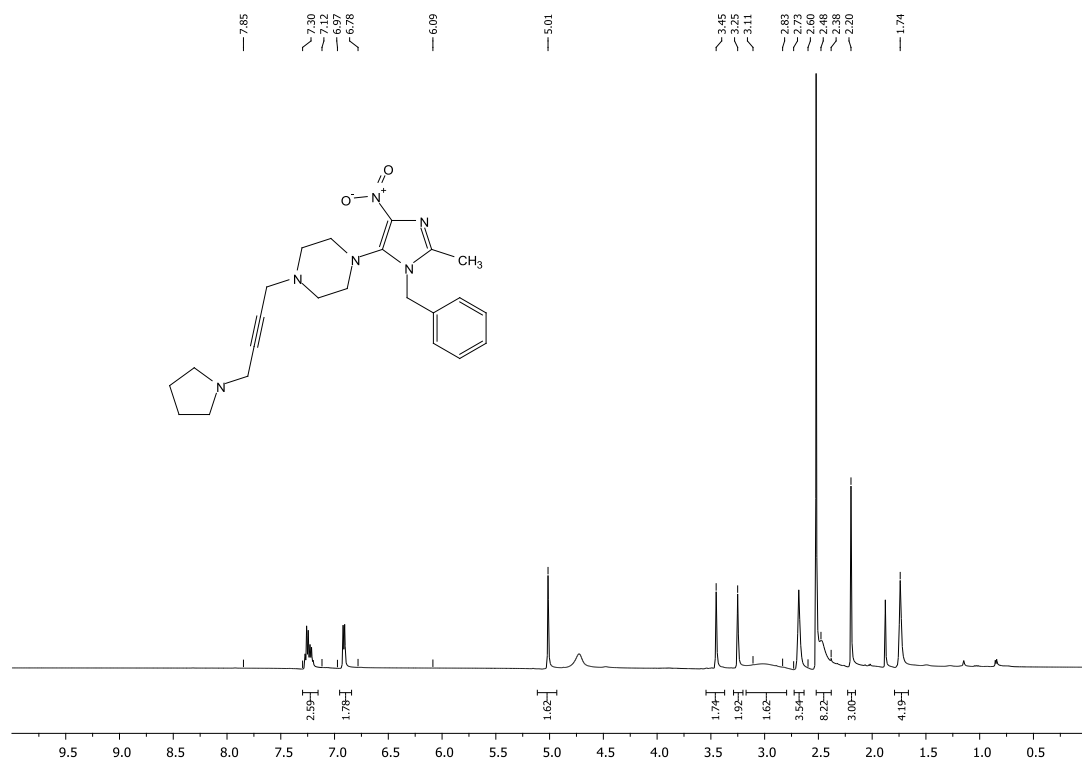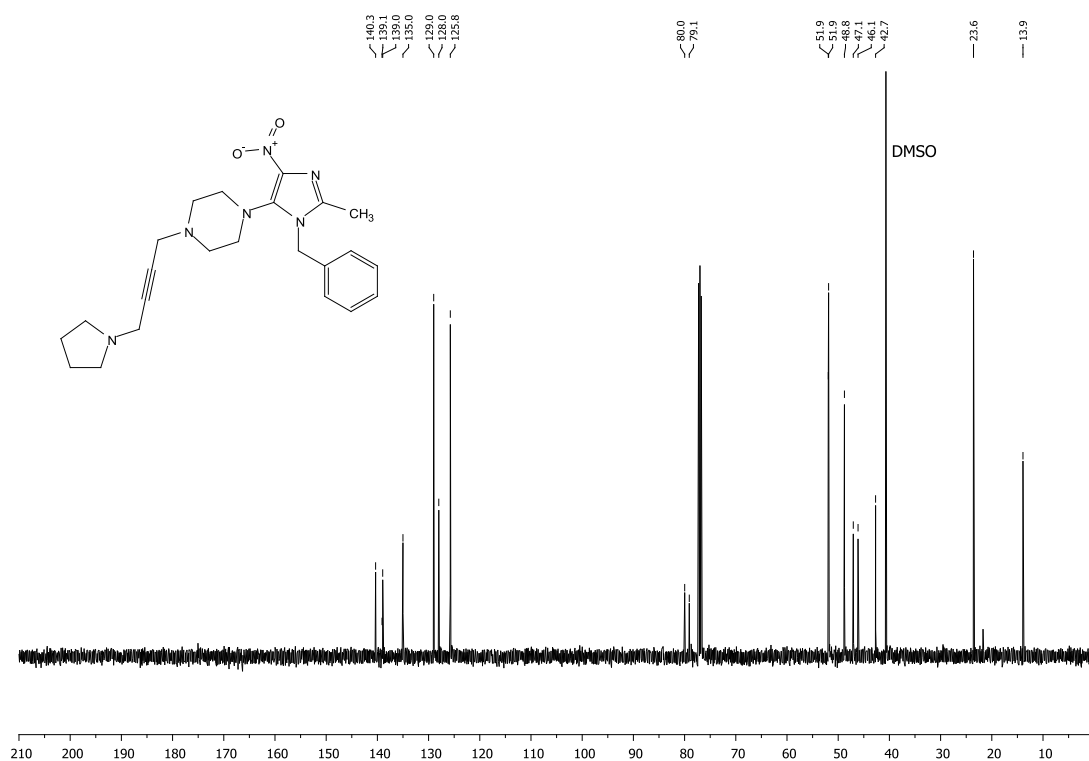

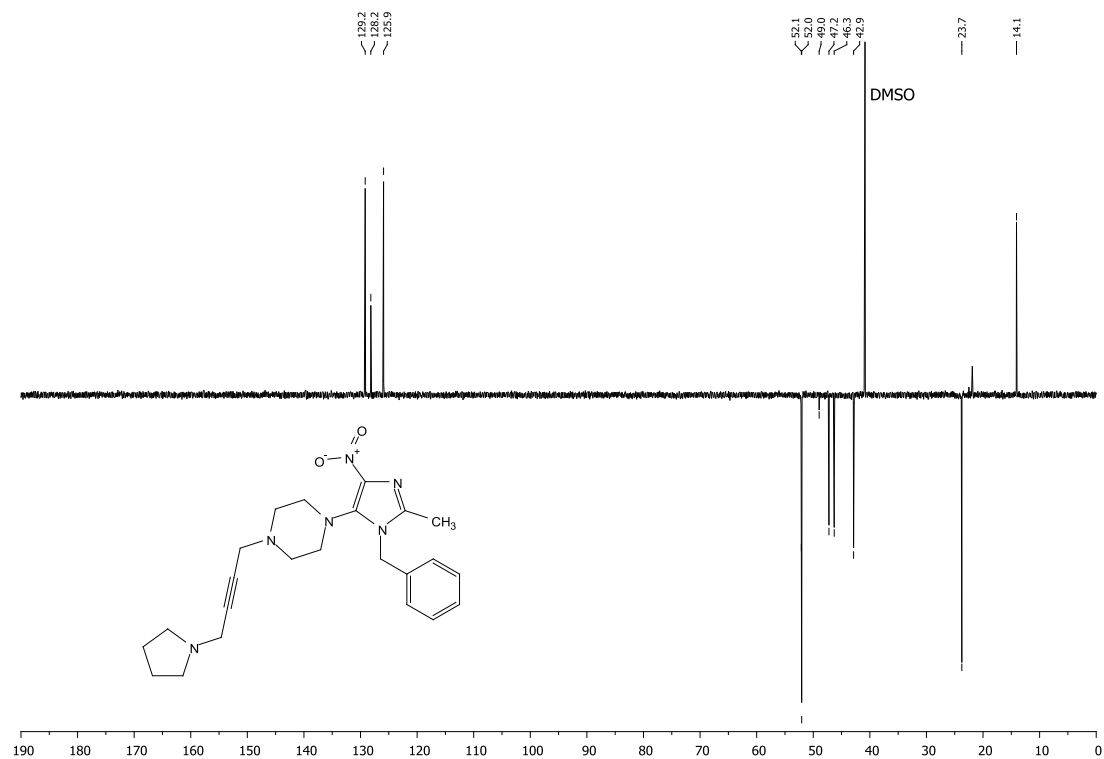

# Compound 10q

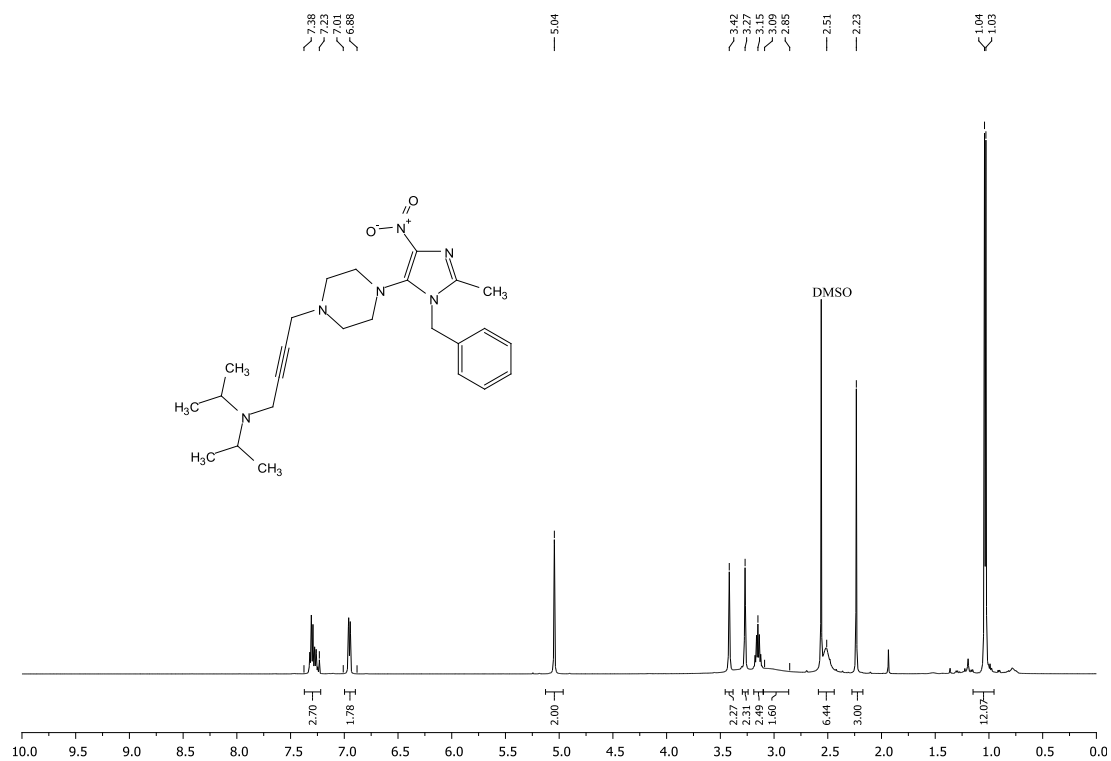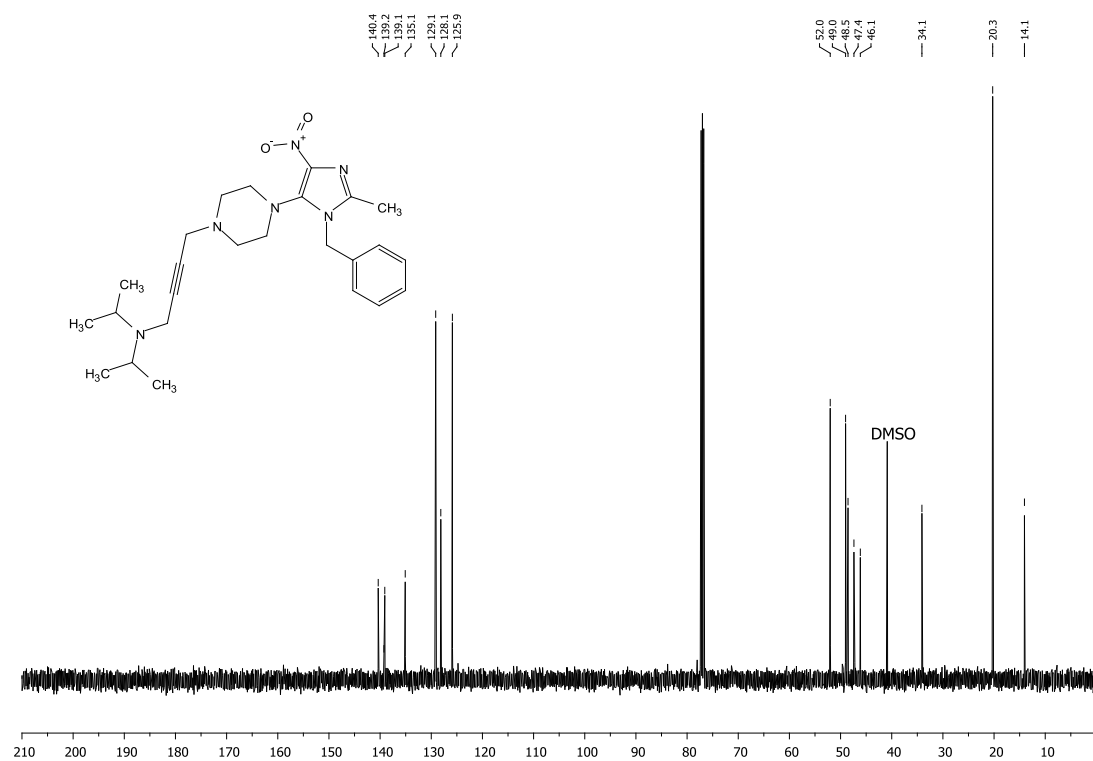

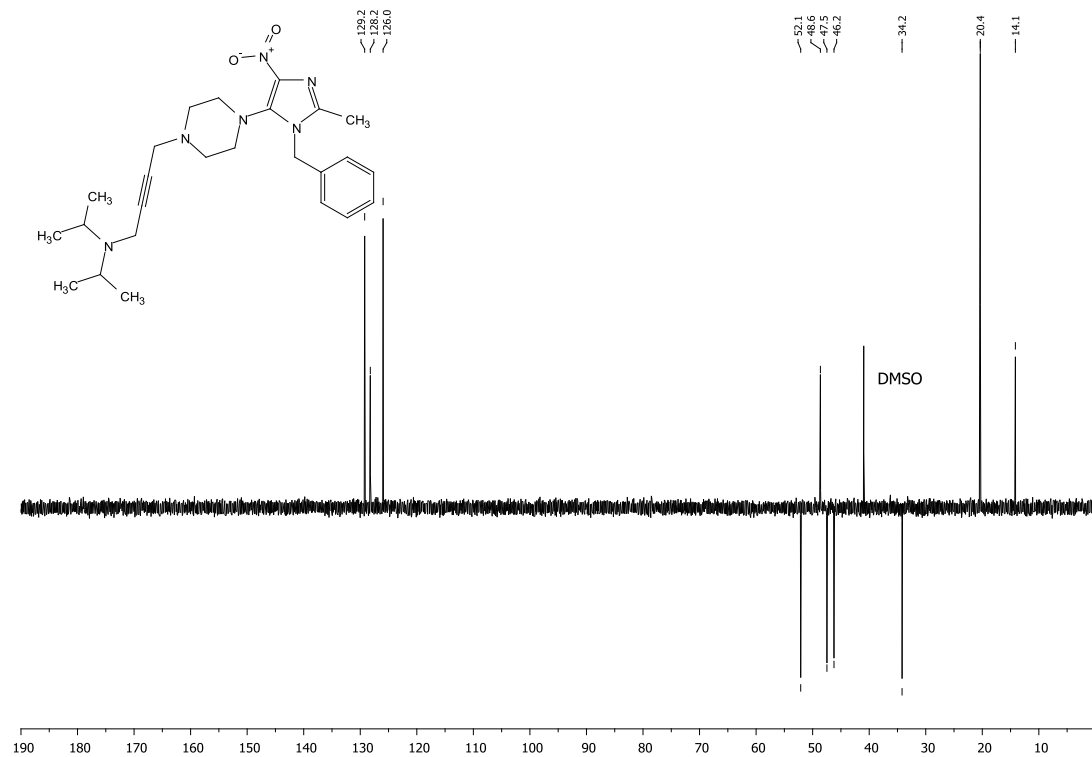

# Compound 10r

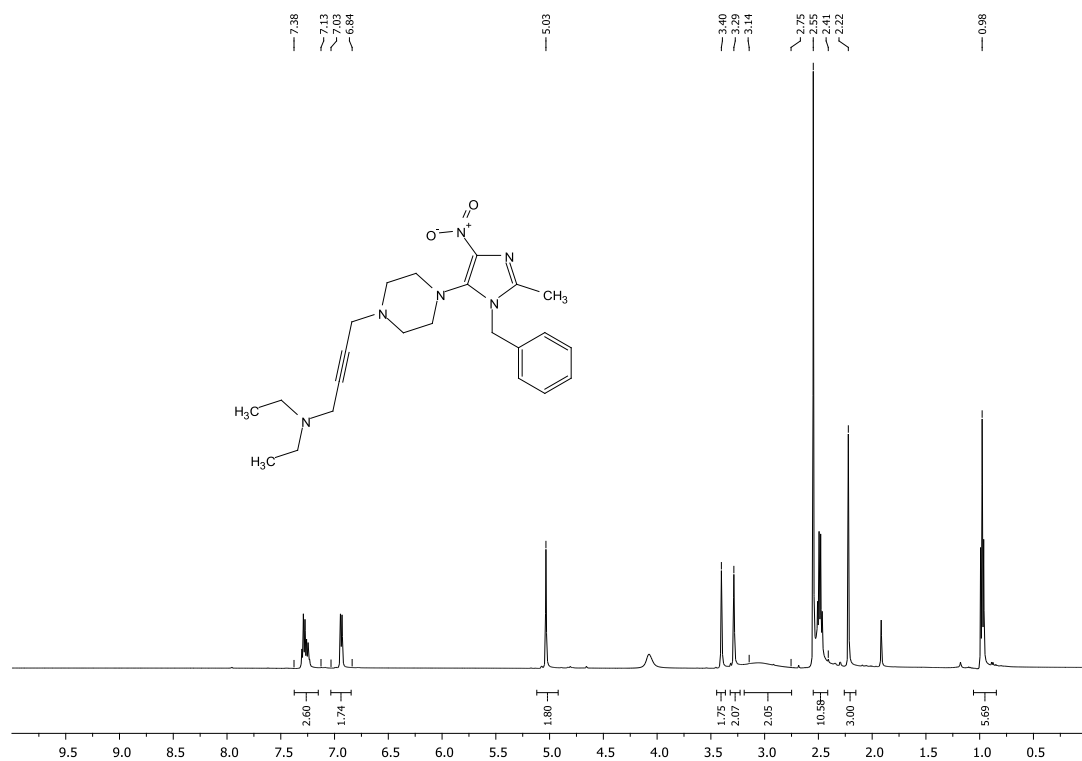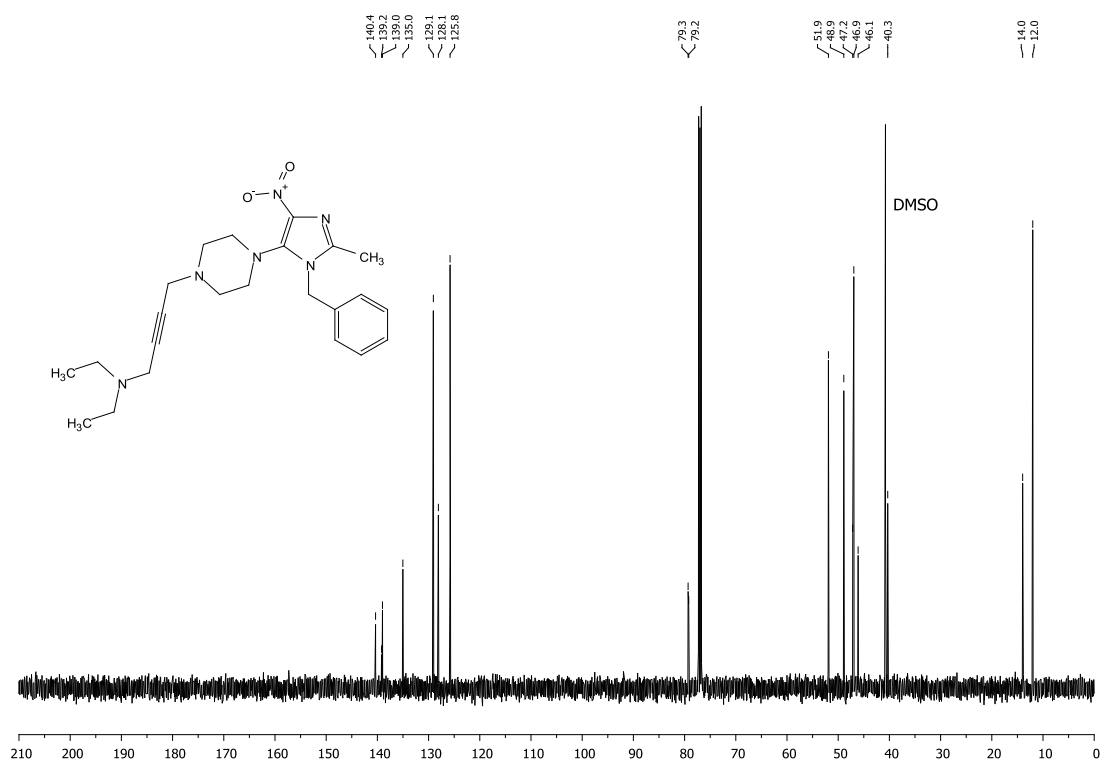

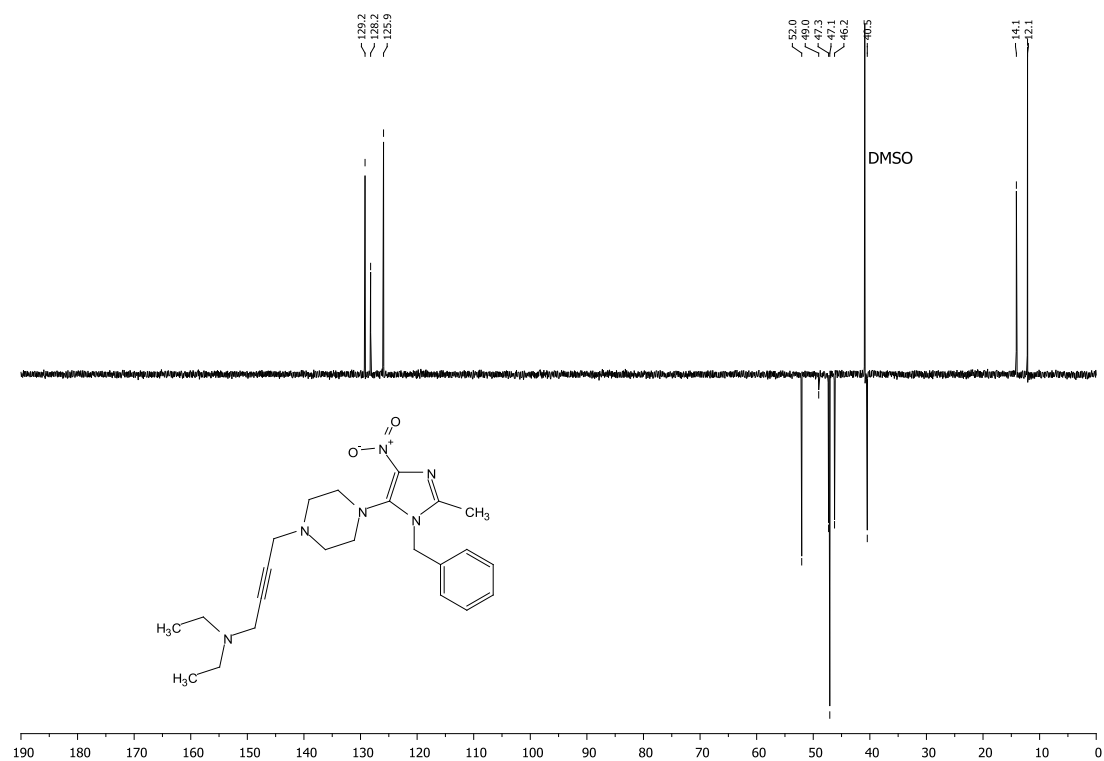

# Compound 10s

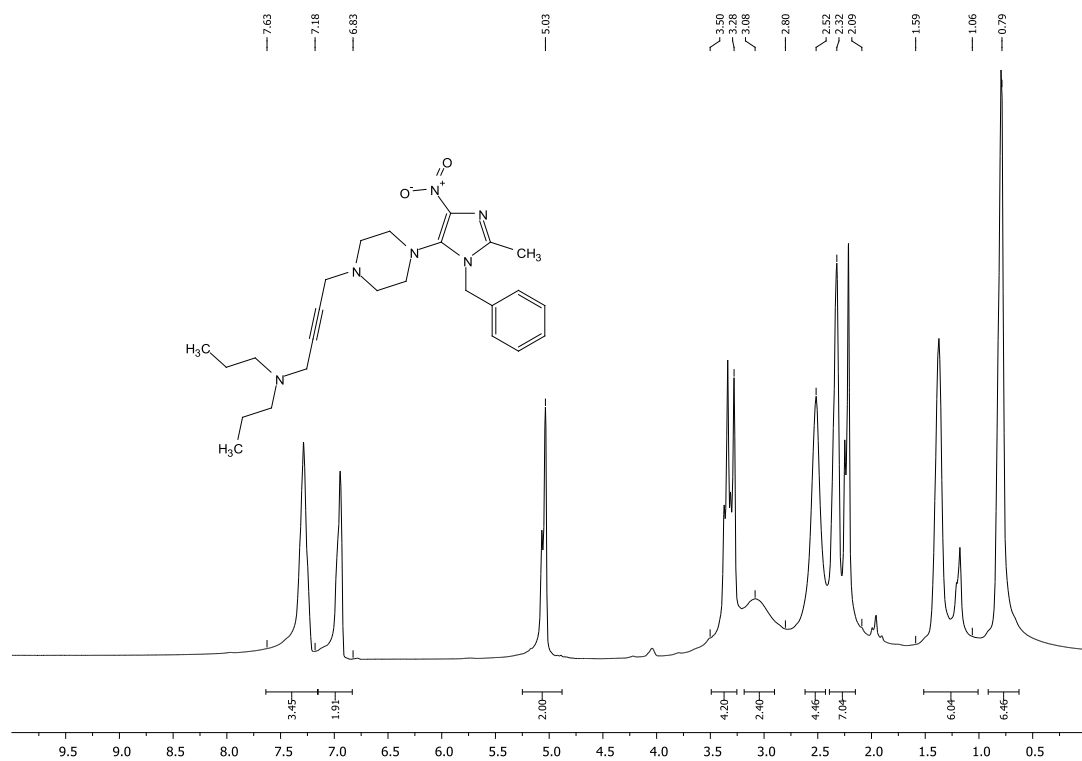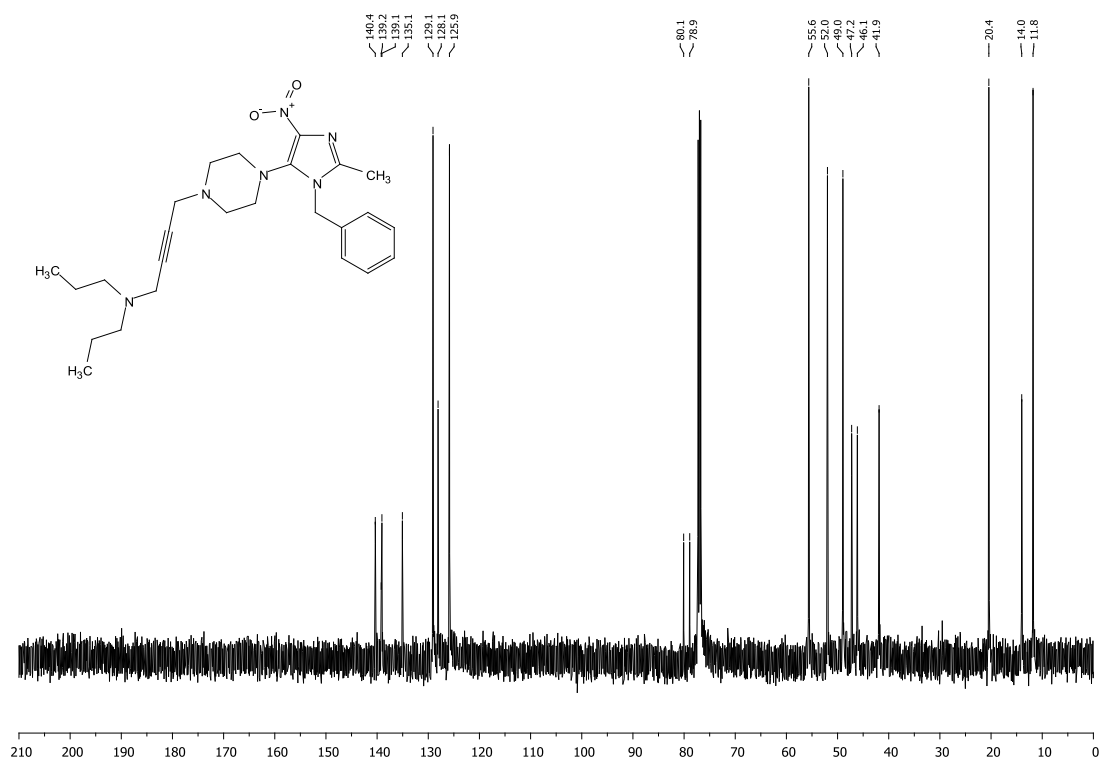

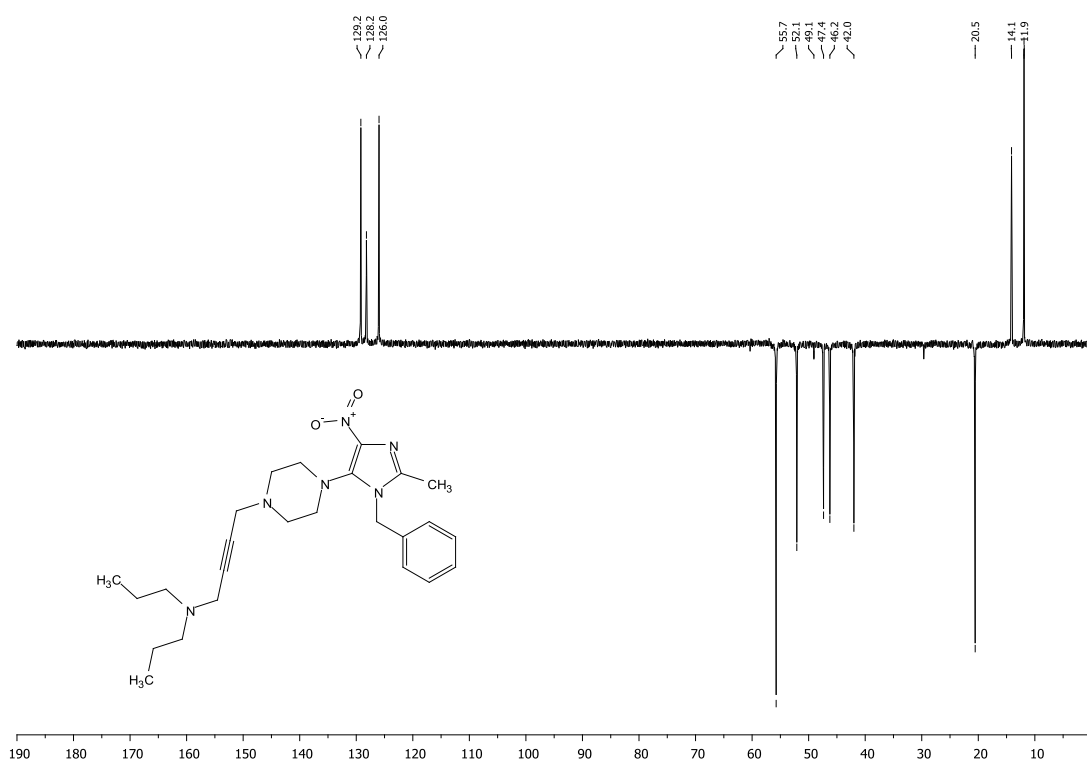



# Compound 10t

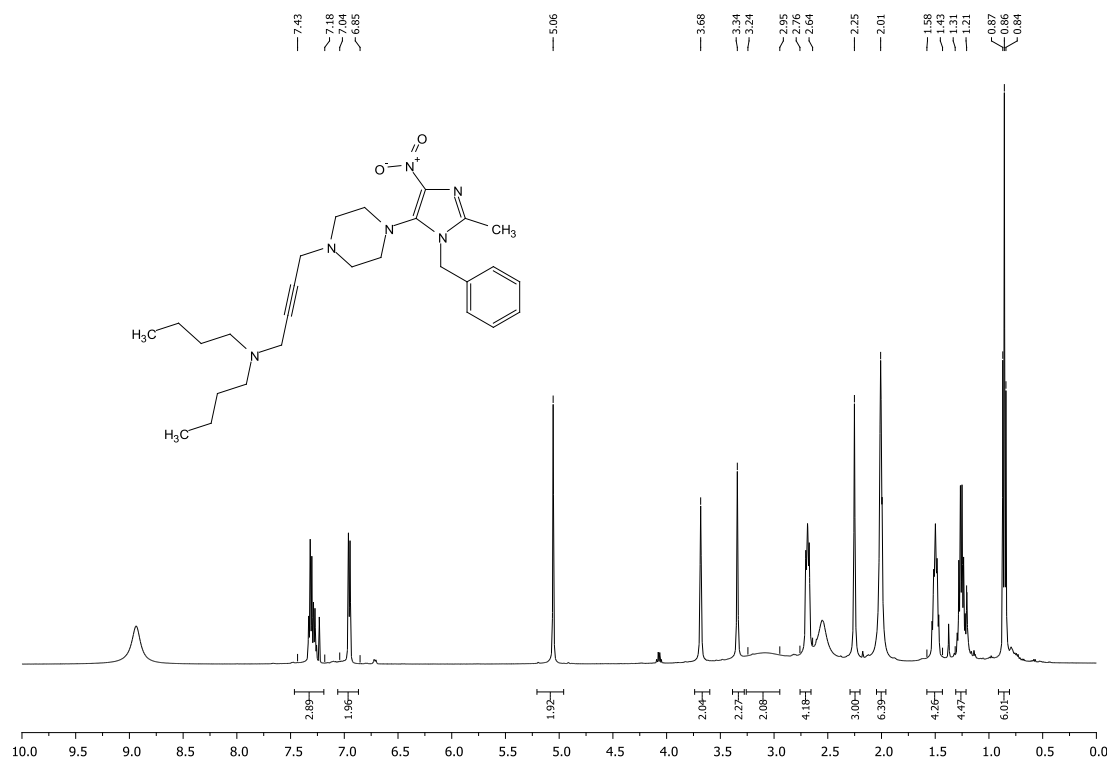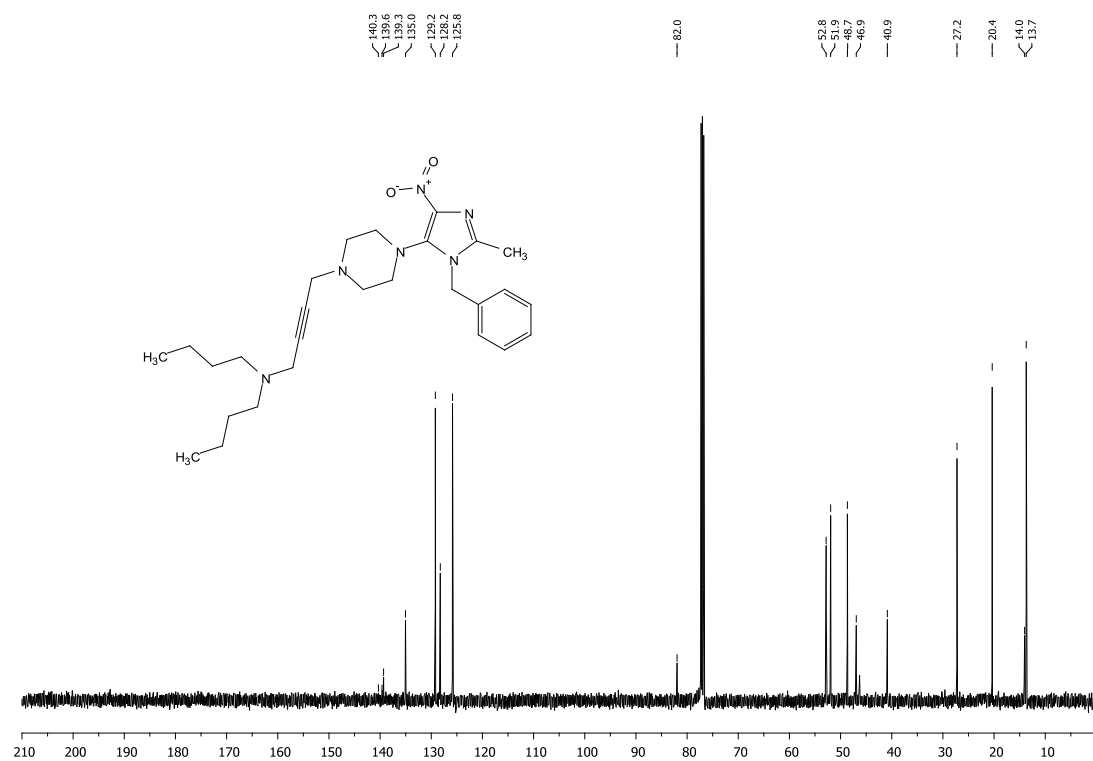

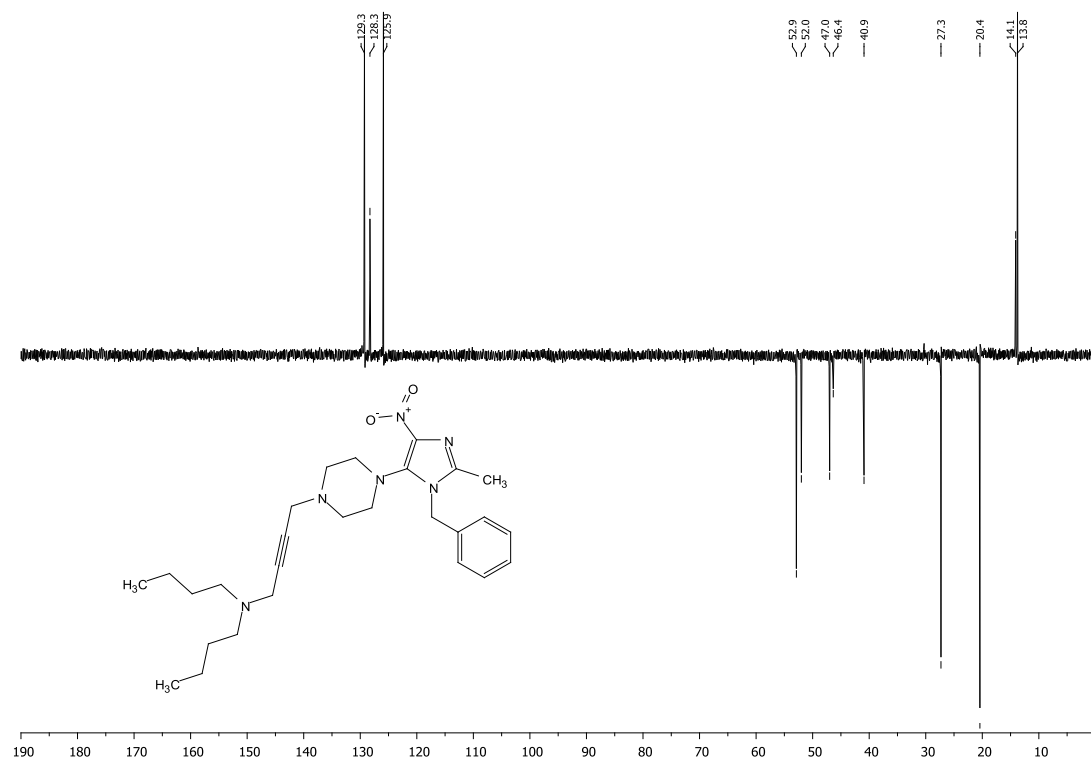

# Compound 10u

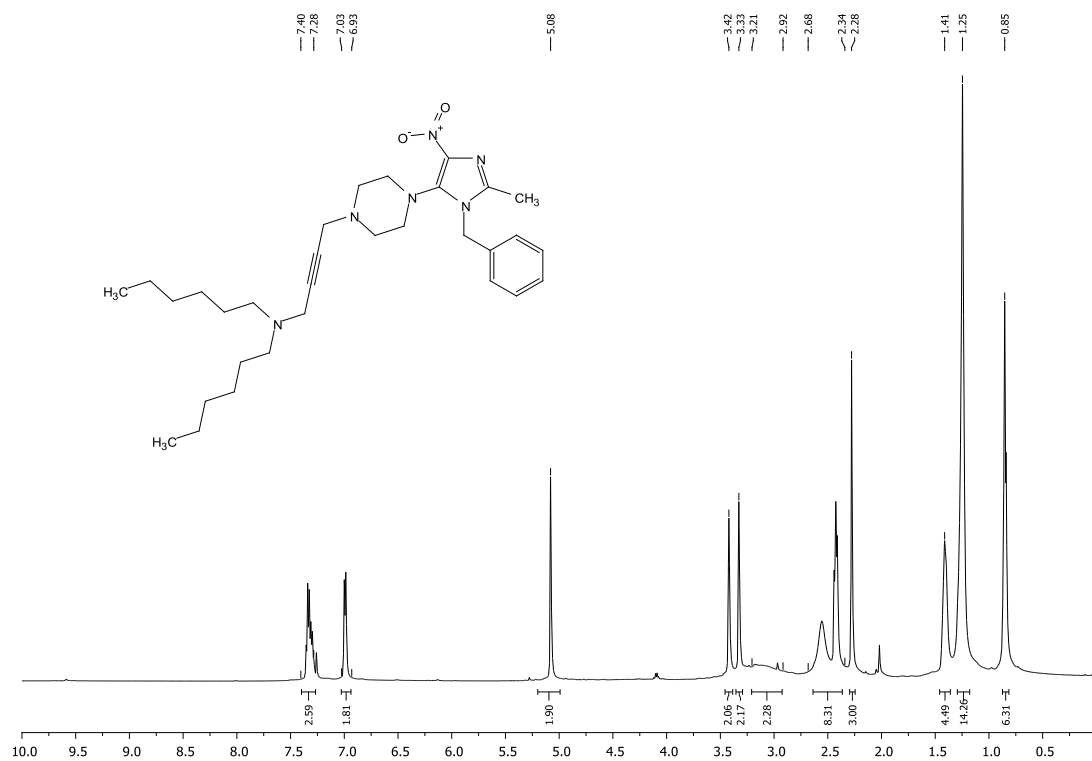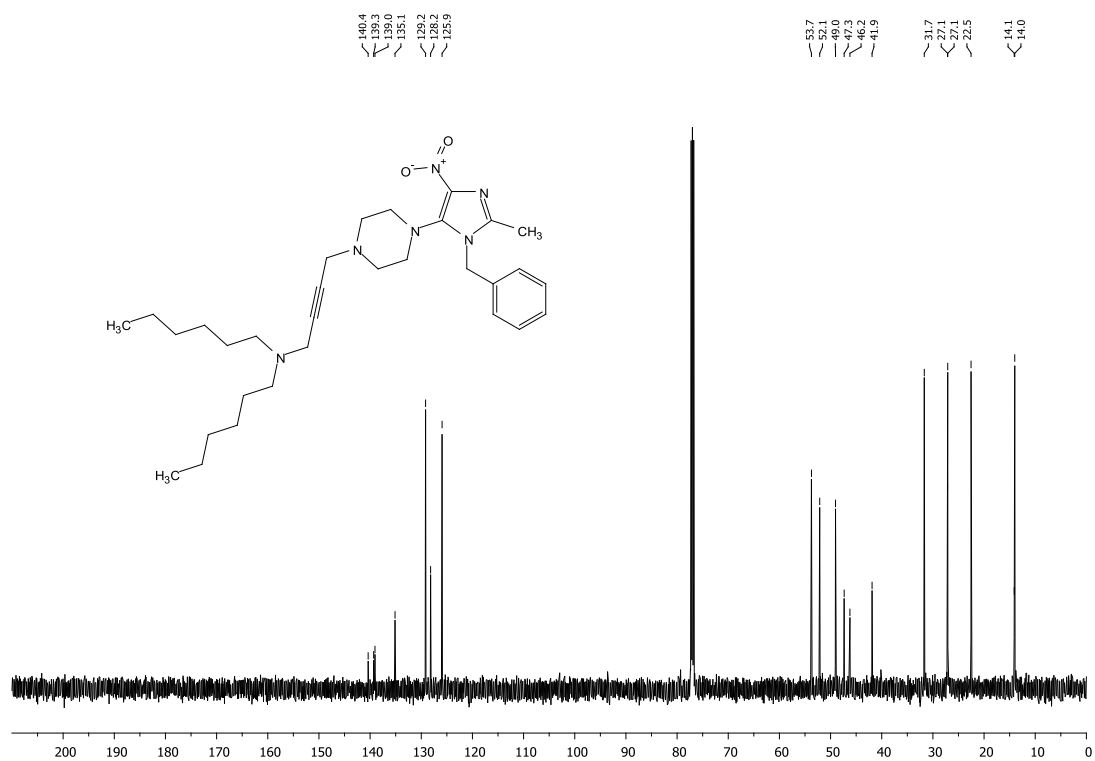

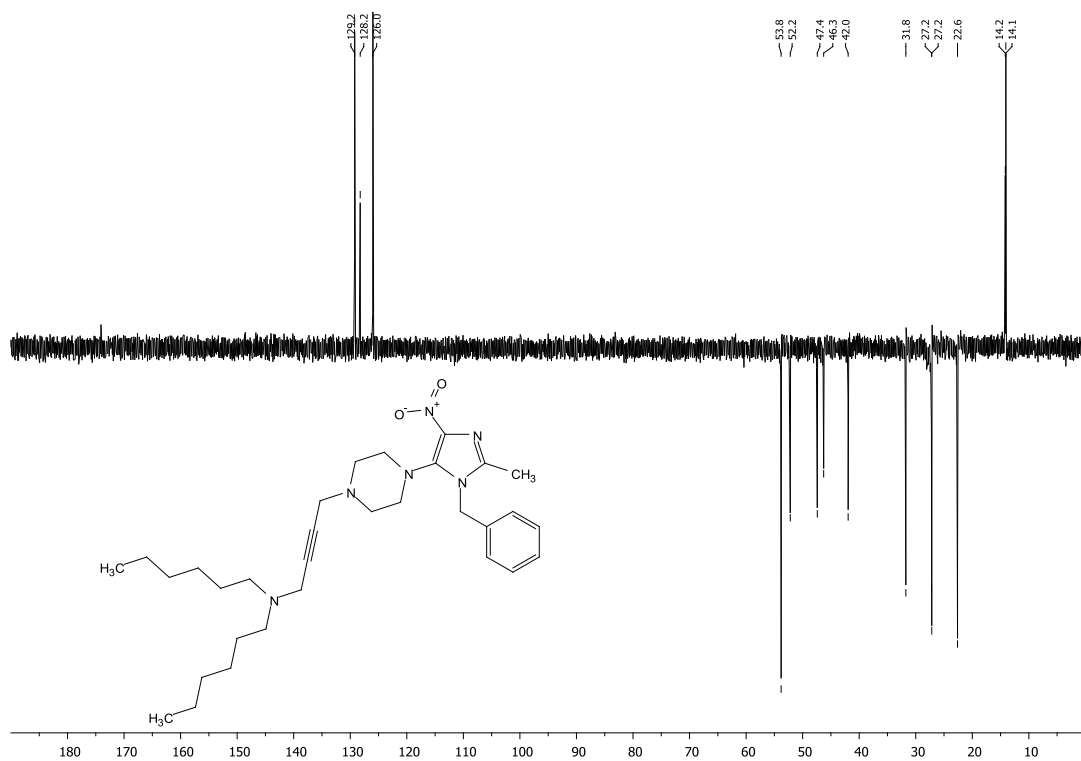

# Compound 10v

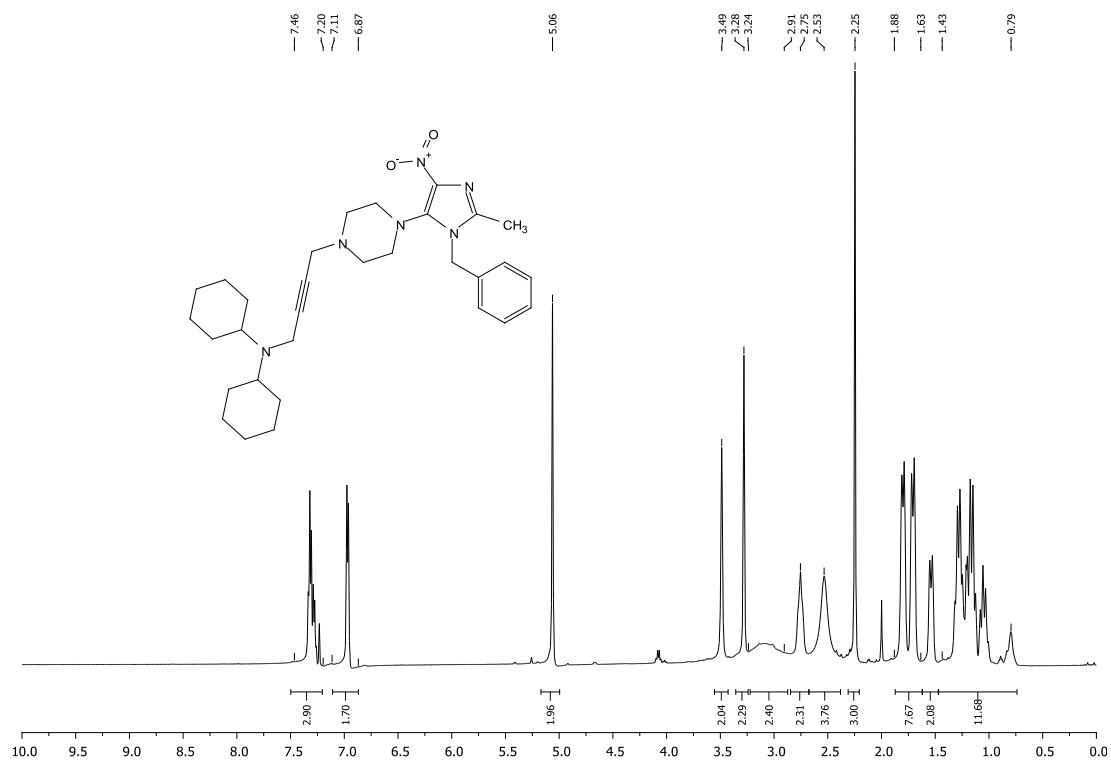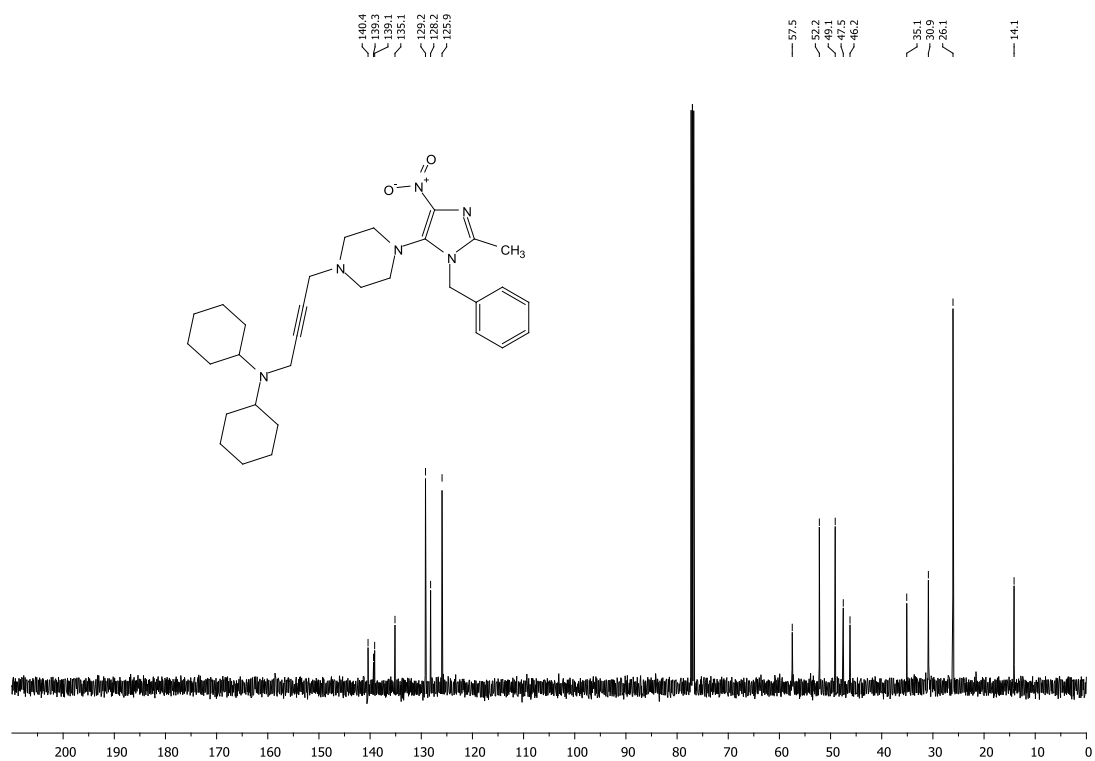

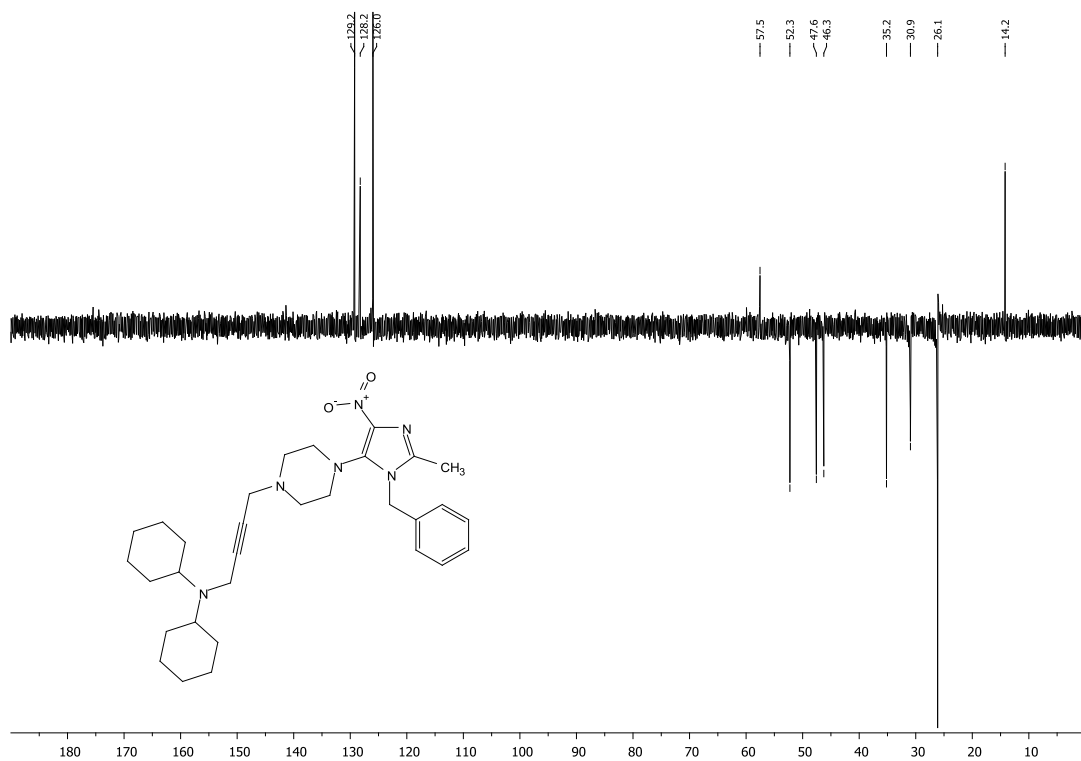

# Compound 10w

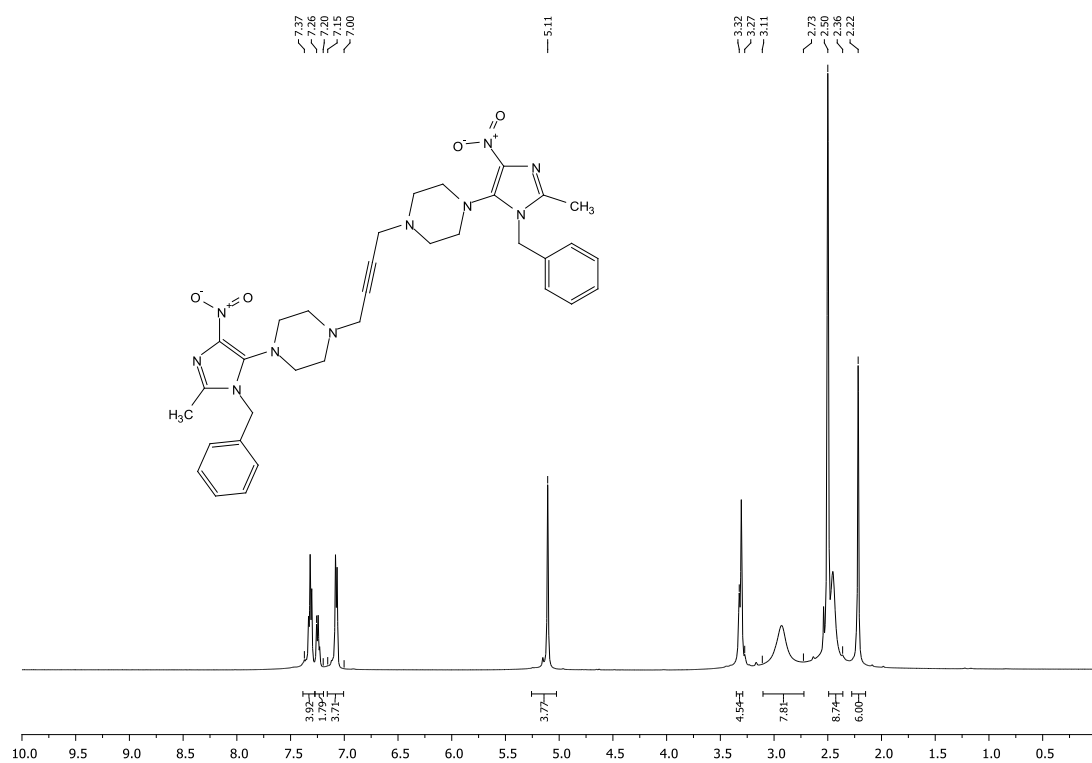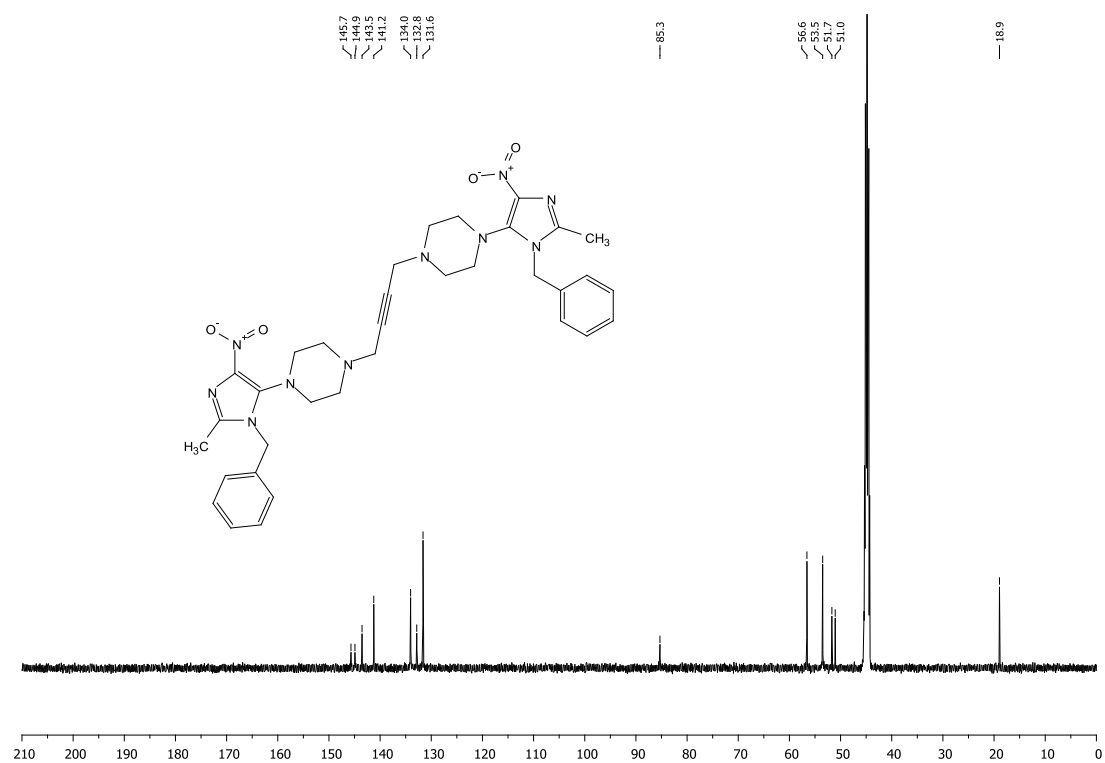

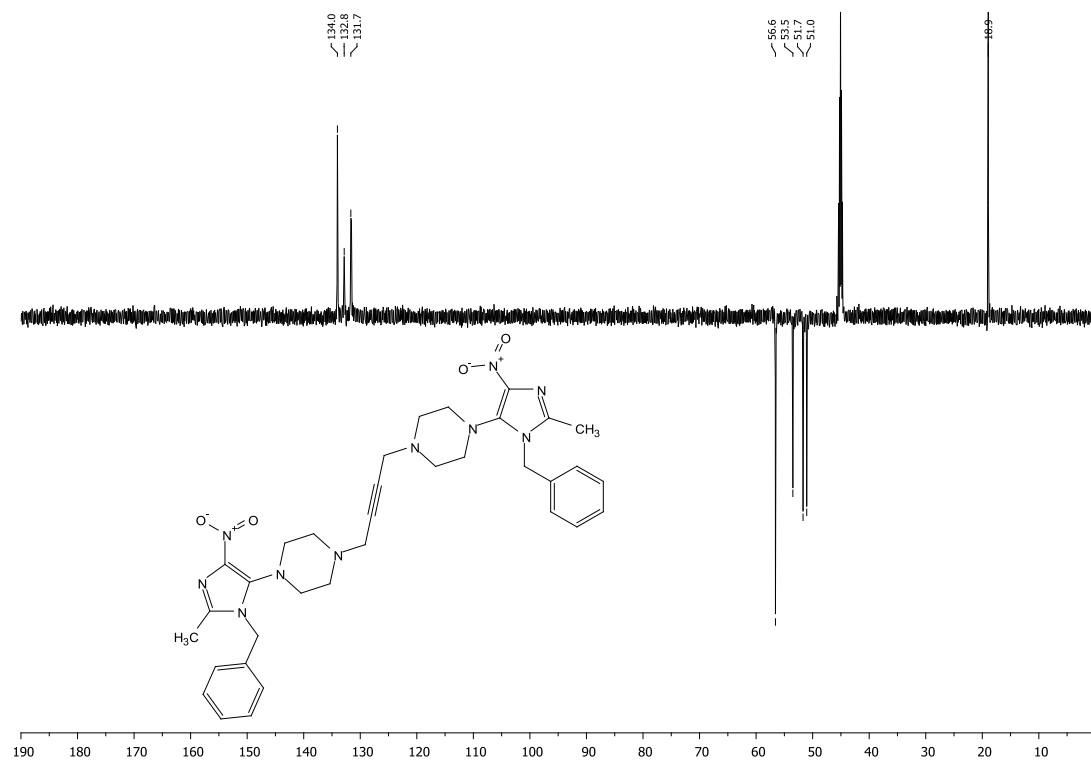

Supplement: Supplementary file 1 [file j_znc-2022-0043_suppl.pdf]
